# Supplementary material for: The costs of suboptimal breastfeeding in Ontario, Canada, and potential economic impacts from improving rates: A health system costing analysis
Source: Research Square preprint supplement (doi:10.21203/rs.3.rs-3220814/v1), 2023-08-07
Supplement: Supplementary file 1 [file 2cb986a64718181eebe96236.xlsx]

## Sheet: StudiesReviewA
First Author	Title	Authors	Citation		Journal/Book	Publication Year	DOI	DataBase	Areas covered/Populations/Setting	CHILD_GastroInfections/Diarrhea	CHILD_Respiratory	CHILD_OtitisMedia	CHILD_Arthritis	CHILD_NecrotisingEnt	CHILD_Cognitive	CHILD_Disability/ASD	CHILD_SIDS	CHILD_Obesity/Composition	CHILD_Mortality	CHILD_Dental	CHILD_Diabetes	CHILD_Allergy	CHILD_Snoring/Breathing	CHILD_Asthma	CHILD_Handedness	CHILD_Cancer	CHILD_Coeliac	CHILD_Cardio	CHILD_Sepsis	CHILD_Infection	CHILD_Vaccine/Immunity	CHILD_Disease/Morbidity	CHILD_Hospitalization	CHILD_NAS	CHILD_Nutrition	CHILD_Colic	CHILD_Pain	CHILD_Cells	CHILD_Skin	CHILD_Eye	CHILD_Microbiome	CHILD_Covid	CHILD_hypothermia	Mother_BreastCancer	Mother_Eso Cancer	Mother_Endometrial Cancer	Mother_Thyroid Cancer	Mother_OvarianCancer	Mother_Type2Diabetes
Abate A	Relationship between breastfeeding and malocclusion: A systematic review of the literature	Abate A, Cavagnetto D, Fama A, Maspero C, Farronato G	Abate, A., Cavagnetto, D., Fama, A., Maspero, C., & Farronato, G. (2020). Relationship between Breastfeeding and Malocclusion: A Systematic Review of the Literature. Nutrients, 12(12), 3688. https://doi.org/10.3390/nu12123688		Nutrients	2020	10.3390/nu12123688	PubMED	unknown											1
Abedi et al	Breastfeeding or nipple stimulation for reducing postpartum haemorrhage in the third stage of labour.	Abedi P, Jahanfar S, Namvar F, Lee J	Cochrane Database of Systematic Reviews 2016, Issue 1.DOI: 10.1002/14651858.CD010845.pub2.		Cochrane Systematic Review - Intervention	2016	10.1002/14651858.CD010845.pub2.	Cochrane Database of Systematic Reviews	India, UK, Malawi, USA																										1
Abreu LG	Breastfeeding, bottle feeding and risk of malocclusion in mixed and permanent dentitions: a systematic review	Abreu LG, Paiva SM, Pordeus IA, Martins CC.	Braz Oral Res. 2016;30:S1806-83242016000100401. doi: 10.1590/1807-3107BOR-2016.vol30.0022. Epub 2016 Mar 28.		Braz Oral Res	2016	10.1590/1807-3107BOR-2016.vol30.0022	PubMED	USA, Brazil, Italy, Spain,											1
Agostoni C	The Long-Term Effects of Dietary Nutrient Intakes during the First 2 years of Life in Healthy Infants from Developed Countries: An Umbrella Review	Carlo Agostoni, Anat Guz-Mark, Luba Marderfeld, Gregorio P Milani, Marco Silano and Raanan Shamir	American Society for Nutrition. All rights reserved. Adv Nutr 2019;0:1–13; doi: https://doi.org/10.1093/advances/nmy106.		American Society for Nutrition	2019	10.1093/advances/nmy106.	Embase																											1
Altobelli E	The impact of human milk on nectrotizing enterocolitis: A systematic review and meta-analysis	Altobelli E, Angeletti PM, Verrotti A, Petrocelli R	Altobelli, E., Angeletti, P. M., Verrotti, A., & Petrocelli, R. (2020). The Impact of Human Milk on Necrotizing Enterocolitis: A Systematic Review and Meta-Analysis. Nutrients, 12(5), 1322. https://doi.org/10.3390/nu12051322		Nutrients	2020	10.3390/nul12051322	PubMED	Europe, Japan and USA					1
Alvarez AE	Epidemiological and genetic characteristics associated with the severity of acute viral bronchiolitis by respiratory syncytial virus	Alvarez AE, Marson FA, Bertuzzo CS, Arns CW, Ribeiro JD.	J Pediatr (Rio J). 2013 Nov-Dec;89(6):531-43. doi: 10.1016/j.jped.2013.02.022. Epub 2013 Sep 12.		J Pediatr (Rio J)	2013	10.1016/j.jped.2013.02.022	PubMED	Brazil and others		1
Amitay EL	Breastfeeding and Childhood Leukemia Incidence: A Meta-analysis and Systematic Review	Amitay EL, Keinan-Boker L.	JAMA Pediatr. 2015 Jun;169(6):e151025. doi: 10.1001/jamapediatrics.2015.1025. Epub 2015 Jun 1.		JAMA Pediatr	2015	10.1001/jamapediatrics.2015.1025	PubMED	Canada, UK, Oman, France, UAE, Turkey, US, Sweden, Russia, New Zealand, Germany, China,																	1
Anothaisintawee T	Risk factors of breast cancer: a systematic review and meta-analysis	Anothaisintawee T, Wiratkapun C, Lerdsitthichai P, Kasamesup V, Wongwaisayawan S, Srinakarin J, Hirunpat S, Woodtichartpreecha P, Boonlikit S, Teerawattananon Y, Thakkinstian A.	Asia Pac J Public Health. 2013 Sep;25(5):368-87. doi: 10.1177/1010539513488795. Epub 2013 May 23.		Asia Pac J Public Health	2013	10.1177/1010539513488795	PubMED	United States & European Countries																																			1
Appleton J	Infant formula feeding practices associated with rapid weight gain: A systematic review	Appleton J, Russell CG, Laws R, Fowler C, Campbell K, Denney-Wilson E.	Matern Child Nutr. 2018 Jul;14(3):e12602. doi: 10.1111/mcn.12602. Epub 2018 Apr 14.		Matern Child Nutr	2018	10.1111/mcn.12602	PubMED	Canada, UK, European Countries, Sweden, US, Germany, Chile, The Netherlands, Australia									1																	1
Aune D	Breastfeeding and the maternal risk of type 2 diabetes: a systematic review and dose-response meta-analysis of cohort studies	Aune D, Norat T, Romundstad P, Vatten LJ.	Nutr Metab Cardiovasc Dis. 2014 Feb;24(2):107-15. doi: 10.1016/j.numecd.2013.10.028. Epub 2013 Nov 10.		Nutr Metab Cardiovasc Dis	2014	10.1016/j.numecd.2013.10.028	PubMED	Germany/USA/Australia/China																																								1
Aune D	Breastfeeding and the maternal risk of type 2 diabetes: a systematic review and dose-response meta-analysis of cohort studies	Aune D, Norat T, Romundstad P, Vatten LJ.	Nutrition Metabolism & Cardiovascular Disease. (2014). 24, 107. http://dx.doi.org/10.1016/j.numecd.2013.10.028		Nutrition, Metabolism & Cardiovascular Diseases	2014	10.1016/j.numecd.2013.10.028	Embase	Germany/USA/Australia/China																																								1
Avila WM	Breast and Bottle Feeding as Risk Factors for Dental Caries: A Systematic Review and Meta-Analysis	Avila WM, Pordeus IA, Paiva SM, Martins CC.	PLoS One. 2015 Nov 18;10(11):e0142922. doi: 10.1371/journal.pone.0142922. eCollection 2015.		PLoS One	2015	10.1371/journal.pone.0142922	PubMED	Syria/China/South Africa/Kuwait/Sri Lanka/Italy											1
Babic A	Association Between Breastfeeding and Ovarian Cancer Risk	Ana Babic, Naoko Sasamoto, Bernard A. Rosner, Shelley S. Tworoger, Susan J. Jordan, Harvey A Risch, Holly R. Harris, Mary Anne Rossing, Jennifer A. Doherty, Renee T. Fortner, Jenny Chang-Claude, Marc T. Goodman, Pamela J. Thompson, Kirsten B. Moysich, Roberta B. Ness, Susanna K. Kjaer, Allan Jensen, Joellen M. Schildkraut, Linda J. Titus, Daniel W. Cramer, Elisa V. Bandera, Weiva Sieh, Valerie Mc…	American Medical Association. (2020). JAMA Oncol. doi:10.1001/jamaoncol.2020.0421		American Medical Association	2020	10.1001/jamaoncol.2020.0421	Embase																											1													1
Benoit B	Breast-Feeding Analgesia in Infants: An Update on the Current State of Evidence	Benoit B, Martin-Misener R, Latimer M, Campbell-Yeo M.	J Perinat Neonatal Nurs. 2017 Apr/Jun;31(2):145-159. doi: 10.1097/JPN.0000000000000253.		J Perinat Neonatal Nurs	2017	10.1097/JPN.0000000000000253	PubMED	Canada/Brazil/Taiwan/Netherlands/China/Iran/India/Italy/Jordan/Spain/Brazil/																										1		1
Bharwani SK	Systematic review and meta-analysis of human milk intake and retinopathy of prematurity: a significant update	Bharwani SK, Green BF, Pezzullo JC, Bharwani SS, Bharwani SS, Dhanireddy R.	J Perinatol. 2016 Nov;36(11):913-920. doi: 10.1038/jp.2016.98. Epub 2016 Jul 14.		J Perinatol	2016	10.1038/jp.2016.98	PubMED	US/Italy/Germany																										1					1
Boronat-Catalá M	Association between duration of breastfeeding and malocclusions in primary and mixed dentition: a systematic review and meta-analysis	Boronat-Catalá M, Montiel-Company JM, Bellot-Arcís C, Almerich-Silla JM, Catalá-Pizarro M.	Sci Rep. 2017 Jul 11;7(1):5048. doi: 10.1038/s41598-017-05393-y.		Sci Rep	2017	10.1038/s41598-017-05393-y	PubMED	Brazil/Spain/India/France/China/Poland/Senegal/Puerto Rico/Italy/Finland/EEUU											1															1
Bowatte G	Breastfeeding and childhood acute otitis media: a systematic review and meta-analysis	Bowatte G, Tham R, Allen KJ, Tan DJ, Lau M, Dai X, Lodge CJ.	Acta Paediatr. 2015 Dec;104(467):85-95. doi: 10.1111/apa.13151.		Acta Paediatr	2015	10.1111/apa.13151	PubMED	North America or Europe			1																							1
Cacho NT	Necrotizing Enterocolitis and Human Milk Feeding: A Systematic Review	Cacho NT, Parker LA, Neu J.	Clin Perinatol. 2017 Mar;44(1):49-67. doi: 10.1016/j.clp.2016.11.009. Epub 2016 Dec 24.		Clin Perinatol	2017	10.1016/j.clp.2016.11.009	PubMED						1																					1
Cardwell CR	Breast-feeding and childhood-onset type 1 diabetes: a pooled analysis of individual participant data from 43 observational studies	Cardwell CR, Stene LC, Ludvigsson J, Rosenbauer J, Cinek O, Svensson J, Perez-Bravo F, Memon A, Gimeno SG, Wadsworth EJ, Strotmeyer ES, Goldacre MJ, Radon K, Chuang LM, Parslow RC, Chetwynd A, Karavanaki K, Brigis G, Pozzilli P, Urbonaite B, Schober E, Devoti G, Sipetic S, Joner G, Ionescu-Tirgoviste C, de Beaufort CE, Harrild K, Benson V, Savilahti E, Ponsonby AL, Salem M, Rabiei S, Patterson CC.	Diabetes Care. 2012 Nov;35(11):2215-25. doi: 10.2337/dc12-0438. Epub 2012 Jul 26.		Diabetes Care	2012	10.2337/dc12-0438	PubMED	Canada, Australia, Iran, Spain, Egypt, Scotland, Qatar, Kuwait, Finland, Greece, Germany, England, Italy, Taiwan, Peru, US, Czech Republic, Denmark, Serbia, China, Sweden, Lithuania, Norway, Chile, Austria, Bulgaria, Latvia, Luxembourg, Northern Ireland, Romania, Brazil, UK, Sardinia,												1
Carreira H	Breast-feeding and Helicobacter pylori infection: systematic review and meta-analysis	Carreira H, Bastos A, Peleteiro B, Lunet N.	Public Health Nutr. 2015 Feb;18(3):500-20. doi: 10.1017/S1368980014000500. Epub 2014 May 1.		Public Health Nutr	2015	10.1017/S1368980014000500	PubMED	Germany/Israel/Mexico/Turkey/Brazil/Cameron/Iran/Vietnam																					1
Chen H	Breastfeeding and Risk of Rheumatoid Arthritis: A Systematic Review and Metaanalysis	Chen H, Wang J, Zhou W, Yin H, Wang M.	J Rheumatol. 2015 Sep;42(9):1563-9. doi: 10.3899/jrheum.150195. Epub 2015 Jul 15.		J Rheumatol	2015	10.3899/jrheum.150195	PubMED	England/USA/Sweden/UK				1																						1
Chen Y	Role of environmental factors in the pathogenesis of Crohn's disease: a critical review	Chen Y, Wang Y, Shen J.	Int J Colorectal Dis. 2019 Dec;34(12):2023-2034. doi: 10.1007/s00384-019-03441-9. Epub 2019 Nov 16.		Int J Colorectal Dis	2019	10.1007/s00384-019-03441-9	PubMED	North America, Asia-Pacific, Europe																							1			1
Cheng J	Improving autism perinatal risk factors: A systematic review	Cheng J, Eskenazi B, Widjaja F, Cordero JF, Hendren RL.	Med Hypotheses. 2019 Jun;127:26-33. doi: 10.1016/j.mehy.2019.03.012. Epub 2019 Mar 23.		Med Hypotheses	2019	10.1016/j.mehy.2019.03.012	PubMED	Unknown							1
Chmielewska A	Systematic review: Early infant feeding practices and the risk of wheat allergy	Chmielewska A, Pieścik-Lech M, Shamir R, Szajewska H.	J Paediatr Child Health. 2017 Sep;53(9):889-896. doi: 10.1111/jpc.13562. Epub 2017 May 17.		J Paediatr Child Health	2017	10.1111/jpc.13562	PubMED	Canada, Finland, USA, Slovakia, UK, Thailand,													1													1
Chowdhury R	Breastfeeding and maternal health outcomes: a systematic review and meta-analysis	Chowdhury R, Sinha B, Sankar MJ, Taneja S, Bhandari N, Rollins N, Bahl R, Martines J.	Acta Paediatr. 2015 Dec;104(467):96-113. doi: 10.1111/apa.13102.		Acta Paediatr	2015	10.1111/apa.13102	PubMED	high income, middle-income and low income countries																																			1				1	1
Cui L	Breastfeeding and early childhood caries: a meta-analysis of observational studies	Cui L, Li X, Tian Y, Bao J, Wang L, Xu D, Zhao B, Li W.	Asia Pac J Clin Nutr. 2017;26(5):867-880. doi: 10.6133/apjcn.082016.09.		Asia Pac J Clin Nutr	2017	10.6133/apjcn.082016.09	PubMED	Canada/Japan/Italy/India/Australia/Iran/Palestine/Turkey/Brazil/Thailand/USA/Syria/China/Jordan/Myanmar/Lithuania											1
D'Auria E	Baby-led weaning: what a systematic review of the literature adds on	D'Auria E, Bergamini M, Staiano A, Banderali G, Pendezza E, Penagini F, Zuccotti GV, Peroni DG; Italian Society of Pediatrics.	Ital J Pediatr. 2018 May 3;44(1):49. doi: 10.1186/s13052-018-0487-8.		Ital J Pediatr	2018	10.1186/s13052-018-0487-8	PubMED	Unknown																										1
Dalili H	Exclusive Breastfeeding Duration and its Effect on the Health of the Children in Iran, a Meta Analysis	Dalili H, Shariat M, Nayeri F, Emami Z, Sahebi R, Sahebi L.	J Pediatr Nurs. 2019 Sep-Oct;48:e8-e14. doi: 10.1016/j.pedn.2019.04.030. Epub 2019 May 25.		J Pediatr Nurs	2019	10.1016/j.pedn.2019.04.030	PubMED	Iran		1																					1			1
de Silva D	Primary prevention of food allergy in children and adults: systematic review	de Silva D, Geromi M, Halken S, Host A, Panesar SS, Muraro A, Werfel T, Hoffmann-Sommergruber K, Roberts G, Cardona V, Dubois AE, Poulsen LK, Van Ree R, Vlieg-Boerstra B, Agache I, Grimshaw K, O'Mahony L, Venter C, Arshad SH, Sheikh A; EAACI Food Allergy and Anaphylaxis Guidelines Group.	Allergy. 2014 May;69(5):581-9. doi: 10.1111/all.12334. Epub 2014 Jan 16.		Allergy	2014	10.1111/all.12334	PubMED	Africa, Asia, Australasia													1
Debes AK	Time to initiation of breastfeeding and neonatal mortality and morbidity: a systematic review	Debes AK, Kohli A, Walker N, Edmond K, Mullany LC.	BMC Public Health. 2013;13 Suppl 3(Suppl 3):S19. doi: 10.1186/1471-2458-13-S3-S19. Epub 2013 Sep 17.		BMC Public Health	2013	10.1186/1471-2458-13-S3-S19	PubMED	middle and low-income countries: Nepal/Ghana/India/Uganda/Zaire/Turkey/Pakistan/Egypt/Zanzibar/Nepal/Malawi/										1													1			1
Dias CC	Breastfeeding and depression: A systematic review of the literature	Dias CC, Figueiredo B	Dias, C. C., & Figueiredo, B. (2015). Breastfeeding and depression: a systematic review of the literature. Journal of affective disorders, 171, 142-154.		Journal of Affective Disorders	2015	10.1016/j.jad.2014.09.022	Google Scholar	Canada/USA/Australia/UK/Congo/Brazil/Mexico/Pakistan/Finland/Iceland/Turkey/Italy/Barbados/Norway/China/Japan
Doğramacı EJ	Malocclusions in young children: Does breast-feeding really reduce the risk? A systematic review and meta-analysis	Doğramacı EJ, Rossi-Fedele G, Dreyer CW.	J Am Dent Assoc. 2017 Aug;148(8):566-574.e6. doi: 10.1016/j.adaj.2017.05.018.		J Am Dent Assoc	2017	10.1016/j.adaj.2017.05.018	PubMED	US/Italy/Brazil											1															1
Duan X	A meta-analysis of breastfeeding and osteoporotic fracture risk in the females	Duan X, Wang J, Jiang X.	Osteoporos Int. 2017 Feb;28(2):495-503. doi: 10.1007/s00198-016-3753-x. Epub 2016 Aug 30.		Osteoporos Int	2017	10.1007/s00198-016-3753-x	PubMED	Spain/Sweden/China/America/China/Norway/America/Australia/European/Korea/Mexico/
Feng LP	Breastfeeding and the risk of ovarian cancer: a meta-analysis	Feng LP, Chen HL, Shen MY.	J Midwifery Womens Health. 2014 Jul-Aug;59(4):428-37. doi: 10.1111/jmwh.12085.		J Midwifery Womens Health	2014	10.1111/jmwh.12085	PubMED	Canada/United States/Thailand/Japan/China/Taiwan/Sweden/Italy/Australia																																							1
Flint A	Cup feeding versus other forms of supplemental enteral feeding for newborn infants unable to fully breastfeed	Flint A, New K, Davies MW.	Cochrane Database Syst Rev. 2016 Aug 31;2016(8):CD005092. doi: 10.1002/14651858.CD005092.pub3.		Cochrane Database Syst Rev	2016	10.1002/14651858.CD005092.pub3	PubMED	UK, Australia, Brazil, Turkey																										1
Flores TR	Prepregnancy weight excess and cessation of exclusive breastfeeding: a systematic review and meta-analysis	Flores TR, Mielke GI, Wendt A, Nunes BP, Bertoldi AD.	Eur J Clin Nutr. 2018 Apr;72(4):480-488. doi: 10.1038/s41430-017-0073-y. Epub 2018 Feb 12.		Eur J Clin Nutr	2018	10.1038/s41430-017-0073-y	PubMED	USA, Denmark, France, Brazil, Belgium, Australia, China, Norweigen									1																	1
Gale C	Effect of breastfeeding compared with formula feeding on infant body composition: a systematic review and meta-analysis	Gale C, Logan KM, Santhakumaran S, Parkinson JR, Hyde MJ, Modi N.	Am J Clin Nutr. 2012 Mar;95(3):656-69. doi: 10.3945/ajcn.111.027284. Epub 2012 Feb 1.		Am J Clin Nutr	2012	10.3945/ajcn.111.027284	PubMED	US/Italy/Netherlands/China/Belgium/Singapore/UK/Australia/Sweden									1
Ghozy S	Association of breastfeeding status with risk of autism spectrum disorder: A systematic review, dose-response analysis and meta-analysis	Ghozy S, Tran L, Naveed S, Quyhn TTH, Zayan, Waqas, Sayed, Karimzadeh, Hirayama, Huy NT	Ghozy, S., Tran, L., Naveed, S., Quynh, T. T. H., Zayan, A. H., Waqas, A., ... & Huy, N. T. (2020). Association of breastfeeding status with risk of autism spectrum disorder: A systematic review, dose-response analysis and meta-analysis. Asian Journal of Psychiatry, 48, 101916.		Asian Journal of Psychiatry	2020	10.1016/j.ajp.2019.101916	Google Scholar	Canada/Australia/Indonesia/IndiaJapan/Oman/Turkey/USA							1
Giannì ML	Body composition changes in the first 6 months of life according to method of feeding	Giannì ML, Roggero P, Orsi A, Piemontese P, Garbarino F, Bracco B, Garavaglia E, Agosti M, Mosca F.	J Hum Lact. 2014 May;30(2):148-55. doi: 10.1177/0890334413516196. Epub 2013 Dec 18.		J Hum Lact	2014	10.1177/0890334413516196	PubMED	Spain/UK/Australia									1
Grossman M	Neonatal Abstinence Syndrome Management: A Review of Recent Evidence	Grossman M, Seashore C, Holmes AV.	Rev Recent Clin Trials. 2017;12(4):226-232. doi: 10.2174/1574887112666170816144818.		Rev Recent Clin Trials	2017	10.2174/1574887112666170816144818	PubMED	Unknown																									1
Güngör D	Infant milk-feeding practices and diagnosed celiac disease and inflammatory bowel disease in offspring: a systematic review	Güngör D, Nadaud P, Dreibelbis C, LaPergola CC, Wong YP, Terry N, Abrams SA, Beker L, Jacobovits T, Järvinen KM, Nommsen-Rivers LA, O'Brien KO, Oken E, Pérez-Escamilla R, Ziegler EE, Spahn JM.	Am J Clin Nutr. 2019 Mar 1;109(Suppl_7):838S-851S. doi: 10.1093/ajcn/nqy371.		Am J Clin Nutr	2019	10.1093/ajcn/nqy371	PubMED	Canada/Italy/Germany/France/New Zealand/US/UK/Sweden/Denmark/Holland/Israel/Japan/China/Slovakia/Australia																		1					1			1
Güngör D	Infant milk-feeding practices and childhood leukemia: a systematic review	Güngör D, Nadaud P, Dreibelbis C, LaPergola CC, Wong YP, Terry N, Abrams SA, Beker L, Jacobovits T, Järvinen KM, Nommsen-Rivers LA, O'Brien KO, Oken E, Pérez-Escamilla R, Ziegler EE, Spahn JM.	Am J Clin Nutr. 2019 Mar 1;109(Suppl_7):757S-771S. doi: 10.1093/ajcn/nqy306.		Am J Clin Nutr	2019	10.1093/ajcn/nqy306	PubMED	Canada/France/UK/US/New Zealand/Australia/Greece/China/Netherlands/UAE/Germany/Russia/Oman																	1									1
Güngör D	Infant milk-feeding practices and food allergies, allergic rhinitis, atopic dermatitis, and asthma throughout the life span: a systematic review	Güngör D, Nadaud P, LaPergola CC, Dreibelbis C, Wong YP, Terry N, Abrams SA, Beker L, Jacobovits T, Järvinen KM, Nommsen-Rivers LA, O'Brien KO, Oken E, Pérez-Escamilla R, Ziegler EE, Spahn JM.	Am J Clin Nutr. 2019 Mar 1;109(Suppl_7):772S-799S. doi: 10.1093/ajcn/nqy283.		Am J Clin Nutr	2019	10.1093/ajcn/nqy283	PubMED	Canada/UK/USA/Sweden/Hong Kong/Netherlands/Australia/Finland/France/Germany/Switzerland/Spain/Taiwan/Ukraine/Italy/Belgium/Belarus													1		1											1		1
Güngör D	Infant milk-feeding practices and diabetes outcomes in offspring: a systematic review	Güngör D, Nadaud P, LaPergola CC, Dreibelbis C, Wong YP, Terry N, Abrams SA, Beker L, Jacobovits T, Järvinen KM, Nommsen-Rivers LA, O'Brien KO, Oken E, Pérez-Escamilla R, Ziegler EE, Spahn JM.	Am J Clin Nutr. 2019 Mar 1;109(Suppl_7):817S-837S. doi: 10.1093/ajcn/nqy311.		Am J Clin Nutr	2019	10.1093/ajcn/nqy311	PubMED	Canada/Brazil/Germany/Austria/Latvia/Lithuania/Luxembourg/UK/Iran/USA/Czech Republic/Italy/Hungary/China/Iceland/Sweden/Denmark/Norway/Finland/Serbia/Lithuania/Australia/Belarus												1														1
Güngör D	Infant milk-feeding practices and cardiovascular disease outcomes in offspring: a systematic review	Güngör D, Nadaud P, LaPergola CC, Dreibelbis C, Wong YP, Terry N, Abrams SA, Beker L, Jacobovits T, Järvinen KM, Nommsen-Rivers LA, O'Brien KO, Oken E, Pérez-Escamilla R, Ziegler EE, Spahn JM.	Am J Clin Nutr. 2019 Mar 1;109(Suppl_7):800S-816S. doi: 10.1093/ajcn/nqy332.		Am J Clin Nutr	2019	10.1093/ajcn/nqy332	PubMED	Netherlands/UK/Belgium/Italy/France/Brazil/Japan/Belarus/Finland/Denmark/Mexico/Iceland/Australia/Brazil																			1							1
Harrison D	Breastfeeding for procedural pain in infants beyond the neonatal period	Harrison D, Reszel J, Bueno M, Sampson M, Shah VS, Taddio A, Larocque C, Turner L.	Cochrane Database Syst Rev. 2016 Oct 28;10(10):CD011248. doi: 10.1002/14651858.CD011248.pub2.		Cochrane Database Syst Rev	2016	10.1002/14651858.CD011248.pub2	PubMED	Canada/Iran/Turkey/India/Jordan																										1		1
Hartwig FP	Effect modification of FADS2 polymorphisms on the association between breastfeeding and intelligence: results from a collaborative meta-analysis	Hartwig FP, Davies NM, Horta BL, Ahluwalia TS, Bisgaard H, Bønnelykke K, Caspi A, Moffitt TE, Poulton R, Sajjad A, Tiemeier HW, Dalmau-Bueno A, Guxens M, Bustamante M, Santa-Marina L, Parker N, Paus T, Pausova Z, Lauritzen L, Schnurr TM, Michaelsen KF, Hansen T, Oddy W, Pennell CE, Warrington NM, Davey Smith G, Victora CG.	Int J Epidemiol. 2019 Feb 1;48(1):45-57. doi: 10.1093/ije/dyy273.		Int J Epidemiol	2019	10.1093/ije/dyy273	PubMED	Canada/Europe/New Zealand/Australia/Brazil						1																				1
Hartz LE	Potential NICU Environmental Influences on the Neonate's Microbiome: A Systematic Review	Hartz LE, Bradshaw W, Brandon DH.	Adv Neonatal Care. 2015 Oct;15(5):324-35. doi: 10.1097/ANC.0000000000000220.		Adv Neonatal Care	2015	10.1097/ANC.0000000000000220	PubMED	US/Portugal/Spain/Netherlands/France																																1
Harvey S	Breastfeeding and wheeze-related outcomes in high-risk infants: A systematic review and meta-analysis	Harvey, S. M., Murphy, V. E., Whalen, O. M., Gibson, P. G., & Jensen, M. E	Harvey, S. M., Murphy, V. E., Whalen, O. M., Gibson, P. G., & Jensen, M. E. (2021). Breastfeeding and wheeze-related outcomes in high-risk infants: A systematic review and meta-analysis. The American journal of clinical nutrition, 113(6), 1609–1618. https://doi.org/10.1093/ajcn/nqaa442		The American journal of clinical nutrition	2021	10.1093/ajcn/nqaa442	PubMED			1
He X	Breast-feeding and postpartum weight retention: a systematic review and meta-analysis	He X, Zhu M, Hu C, Tao X, Li Y, Wang Q, Liu Y.	Public Health Nutr. 2015 Dec;18(18):3308-16. doi: 10.1017/S1368980015000828. Epub 2015 Apr 21.		Public Health Nutr	2015	10.1017/S1368980015000828	PubMED	USA/Brazil/France/Georgia/Croatia									1																	1														1
Henriksson C	What effect does breastfeeding have on coeliac disease? A systematic review update	Henriksson C, Boström AM, Wiklund IE.	Evid Based Med. 2013 Jun;18(3):98-103. doi: 10.1136/eb-2012-100607. Epub 2012 Aug 4.		Evid Based Med	2013	10.1136/eb-2012-100607	PubMED	USA/Serbia/Spain																		1								1
Hermont AP	Breastfeeding, bottle feeding practices and malocclusion in the primary dentition: a systematic review of cohort studies	Hermont AP, Martins CC, Zina LG, Auad SM, Paiva SM, Pordeus IA.	Int J Environ Res Public Health. 2015 Mar 16;12(3):3133-51. doi: 10.3390/ijerph120303133.		Int J Environ Res Public Health	2015	10.3390/ijerph120303133	PubMED	Canada/Finland/USA/Italy/Mexico/Brazil											1															1
Heshmati J	Effect of Breastfeeding in Early Life on Cardiorespiratory and Physical Fitness: A Systematic Review and Meta-Analysis	Heshmati J, Sepidarkish M, Shidfar F, Shokri F, Vesali S, Akbari M, Omani-Samani R.	Breastfeed Med. 2018 May;13(4):248-258. doi: 10.1089/bfm.2018.0001. Epub 2018 Apr 17.		Breastfeed Med	2018	10.1089/bfm.2018.0001	PubMED	Europe (Belgium/Cyprus/Estonia/Germany/Hungary/Italy/Spain/Sweden)/England/Iran																			1
Hess C	Breastfeeding and Childhood Obesity Among African Americans: A Systematic Review	Hess C, Ofei A, Mincher A.	MCN Am J Matern Child Nurs. 2015 Sep-Oct;40(5):313-9. doi: 10.1097/NMC.0000000000000170.		MCN Am J Matern Child Nurs	2015	10.1097/NMC.0000000000000170	PubMED	United States/African Americans									1																	1
Ho NT	Meta-analysis of effects of exclusive breastfeeding on infant gut microbiota across populations	Ho NT, Li F, Lee-Sarwar KA, Tun HM, Brown BP, Pannaraj PS, Bender JM, Azad MB, Thompson AL, Weiss ST, Azcarate-Peril MA, Litonjua AA, Kozyrskyj AL, Jaspan HB, Aldrovandi GM, Kuhn L.	Nat Commun. 2018 Oct 9;9(1):4169. doi: 10.1038/s41467-018-06473-x.		Nat Commun	2018	10.1038/s41467-018-06473-x	PubMED	Canada/Bangladesh/Haiti/South Africa/USA/																										1						1
Horta BL	Breastfeeding and Type 2 Diabetes: Systematic Review and Meta-Analysis	Horta BL, de Lima NP	Springer Science+Business Media. (2019). 19:1. https://doi.org/10.1007/s11892-019-1121-x		Springer Science+Business Media	2019	10.1007/s11892-019-1121-x	Embase	Mix of high income, middle income and low income countries																										1														1
Horta BL	Breastfeeding and intelligence: a systematic review and meta-analysis	Horta BL, Loret de Mola C, Victora CG.	Acta Paediatr. 2015 Dec;104(467):14-9. doi: 10.1111/apa.13139.		Acta Paediatr	2015	10.1111/apa.13139	PubMED	Mix of high income, middle income and low income countries						1																				1
Horta BL	Long-term consequences of breastfeeding on cholesterol, obesity, systolic blood pressure and type 2 diabetes: a systematic review and meta-analysis	Horta BL, Loret de Mola C, Victora CG.	The Authors. Acta Pædiatrica published by John Wiley & Sons Ltd on behalf of Foundation Acta Pædiatrica 2015 104, pp. 30–37		Acta Paediatrica	2015	10.1111/apa.13133	Embase	Mix of high income, middle income and low income countries									1										1							1
Horta BL	Breastfeeding and neurodevelopmental outcomes	Horta BL, de Sousa BA, de Mola CL.	Wolters Kluwer Health. (2018). 21:000–000. DOI:10.1097/MCO.0000000000000453		Wolters Kluwer Health	2018	10.1097/MCO.0000000000000453	Embase	France, Spain, Finland						1																				1
Huang J	Human milk as a protective factor for bronchopulmonary dysplasia: a systematic review and meta-analysis	Huang J, Zhang L, Tang J, Shi J, Qu Y, Xiong T, Mu D.	Arch Dis Child Fetal Neonatal Ed. 2019 Mar;104(2):F128-F136. doi: 10.1136/archdischild-2017-314205. Epub 2018 Jun 15.		Arch Dis Child Fetal Neonatal Ed	2019	10.1136/archdischild-2017-314205	PubMED	The Netherlands/USA/UK/Chile/Austria/China/Israel/Italy/Germany/Australia		1																					1			1
Hujoel PP	Breastfeeding and handedness: a systematic review and meta-analysis of individual participant data	Hujoel PP.	Laterality. 2019 Sep;24(5):582-599. doi: 10.1080/1357650X.2018.1555254. Epub 2018 Dec 18.		Laterality	2019	10.1080/1357650X.2018.1555254	PubMED	UK, Ireland, US, Australia																1										1
Islami F	Breastfeeding and breast cancer risk by receptor status--a systematic review and meta-analysis	Islami F, Liu Y, Jemal A, Zhou J, Weiderpass E, Colditz G, Boffetta P, Weiss M.	Ann Oncol. 2015 Dec;26(12):2398-407. doi: 10.1093/annonc/mdv379. Epub 2015 Oct 26.		Ann Oncol	2015	10.1093/annonc/mdv379	PubMED	Canada/US/Europe/North America/Asia/Australia																										1									1
Jäger S	Breast-feeding and maternal risk of type 2 diabetes: a prospective study and meta-analysis	Jäger S, Jacobs S, Kröger J, Fritsche A, Schienkiewitz A, Rubin D, Boeing H, Schulze MB.	Diabetologia. 2014 Jul;57(7):1355-65. doi: 10.1007/s00125-014-3247-3. Epub 2014 May 1.		Diabetologia	2014	10.1007/s00125-014-3247-3	PubMED	USA/China/Germany/Shanghai																										1														1
Kelty E	Risk Factors Associated with the Occurrence of Neonatal Opioid Withdrawal Syndrome: A Review	Kelty E, Preen DB.	CNS Drugs. 2019 Nov;33(11):1113-1120. doi: 10.1007/s40263-019-00681-9.		CNS Drugs	2019	10.1007/s40263-019-00681-9	PubMED	Unknown																									1
Khan J	Timing of breastfeeding initiation and exclusivity of breastfeeding during the first month of life: effects on neonatal mortality and morbidity--a systematic review and meta-analysis	Khan J, Vesel L, Bahl R, Martines JC.	Matern Child Health J. 2015 Mar;19(3):468-79. doi: 10.1007/s10995-014-1526-8.		Matern Child Health J	2015	10.1007/s10995-014-1526-8	PubMED	US, Latin America, developing countries in Asia, Africa	1	1								1										1			1
Koletzko B	Nutrition During Pregnancy, Lactation and Early Childhood and its Implications for Maternal and Long-Term Child Health: The Early Nutrition Project Recommendations	Koletzko B, Godfrey KM, Poston L, Szajewska H, van Goudoever JB, de Waard M, Brands B, Grivell RM, Deussen AR, Dodd JM, Patro-Golab B, Zalewski BM; EarlyNutrition Project Systematic Review Group.	Ann Nutr Metab. 2019;74(2):93-106. doi: 10.1159/000496471. Epub 2019 Jan 23.		Ann Nutr Metab	2019	10.1159/000496471	PubMED	US, UK, Europe									1																	1
Kramer MS	Optimal duration of exclusive breastfeeding	Kramer M.S, Kakuma R	The Cochrane Library. 2012. 8. DOI: 10.1002/14651858.CD003517.pub2.		Cochrane Systematic Review - Intervention	2012	10.1002/14651858.CD003517.pub2.	Cochrane	Philipines/USA/Sweden/Peru/Chile/Netherlands/Bangladesh/Italy/India/Senegal/Honduras/Belarus/Iran/Nigeria/Finland/Australia	1																									1
Lamberti LM	Breastfeeding for reducing the risk of pneumonia morbidity and mortality in children under two: a systematic literature review and meta-analysis	Lamberti LM, Zakarija-Grković I, Fischer Walker CL, Theodoratou E, Nair H, Campbell H, Black RE.	BMC Public Health. 2013;13 Suppl 3(Suppl 3):S18. doi: 10.1186/1471-2458-13-S3-S18. Epub 2013 Sep 17.		BMC Public Health	2013	10.1186/1471-2458-13-S3-S18	PubMED	Asia/Latin America/Africa/Western Pacific/		1								1											1		1	1
Lavagno C	Breastfeeding-Associated Hypernatremia: A Systematic Review of the Literature	Lavagno C, Camozzi P, Renzi S, Lava SA, Simonetti GD, Bianchetti MG, Milani GP.	J Hum Lact. 2016 Feb;32(1):67-74. doi: 10.1177/0890334415613079. Epub 2015 Nov 3.		J Hum Lact	2016	10.1177/0890334415613079	PubMED	Unknown																			1							1
Le Doare K	Breast milk and Group B streptococcal infection: vector of transmission or vehicle for protection?	Le Doare K, Kampmann B.	Vaccine. 2014 May 30;32(26):3128-32. doi: 10.1016/j.vaccine.2014.04.020. Epub 2014 Apr 13.		Vaccine	2014	10.1016/j.vaccine.2014.04.020	PubMED	Unknown																					1					1
Lefebvre CM	The effect of breastfeeding on childhood overweight and obesity: a systematic review of the literature	Lefebvre CM, John RM.	J Am Assoc Nurse Pract. 2014 Jul;26(7):386-401. doi: 10.1002/2327-6924.12036. Epub 2013 Jul 12.		J Am Assoc Nurse Pract	2014	10.1002/2327-6924.12036	PubMED	Kuwait/Brazil/Germany/Australia/US (Hispanic)/Netherlands/Iran/England/Wales/Ireland/Sweden/Brazil/Northern Mariana Islands/Singapore/Germany/									1																	1
Li DP	Breastfeeding and ovarian cancer risk: a systematic review and meta-analysis of 40 epidemiological studies	Li DP, Du C, Zhang ZM, Li GX, Yu ZF, Wang X, Li PF, Cheng C, Liu YP, Zhao YS.	Asian Pac J Cancer Prev. 2014;15(12):4829-37. doi: 10.7314/apjcp.2014.15.12.4829.		Asian Pac J Cancer Prev	2014	10.7314/apjcp.2014.15.12.4829	PubMED	Canada/China/Poland/Thailand/Italy/Mexico/USA/UK/Vietnam/Australia/Denmark/Sweden/Japan/European Countries																										1									1				1
Lin B	Breastfeeding and Atopic Dermatitis Risk: A Systematic Review and Meta-Analysis of Prospective Cohort Studies	Lin, B., Dai, R., Lu, L., Fan, X., & Yu, Y	Lin, B., Dai, R., Lu, L., Fan, X., & Yu, Y. (2020). Breastfeeding and Atopic Dermatitis Risk: A Systematic Review and Meta-Analysis of Prospective Cohort Studies. Dermatology (Basel, Switzerland), 236(4), 345–360. https://doi.org/10.1159/000503781		Dermatology	2020	10.1159/000503781	PubMED	Europe/Asia/Australia (high-income, middle-income, and low-income)																														1
Linde K	The association between breastfeeding and attachment: A systematic review	Linde K, Lehnig F, Nagl M, Kersting A.	Midwifery. 2020 Feb;81:102592. doi: 10.1016/j.midw.2019.102592. Epub 2019 Nov 30.		Midwifery	2020	10.1016/j.midw.2019.102592	PubMED	North America/Europe/New Zealand/Australia																										1
Liu SJ	[A Meta analysis of risk factors for asthma in Chinese children]	Liu SJ, Wang TT, Cao SY, Tan YQ, Chen LZ.	Zhongguo Dang Dai Er Ke Za Zhi. 2018 Mar;20(3):218-223. doi: 10.7499/j.issn.1008-8830.2018.03.011.		Zhongguo Dang Dai Er Ke Za Zhi	2018	10.7499/j.issn.1008-8830.2018.03.011	PubMED	China															1
Lodge CJ	Breastfeeding and asthma and allergies: a systematic review and meta-analysis	Lodge CJ, Tan DJ, Lau MX, Dai X, Tham R, Lowe AJ, Bowatte G, Allen KJ, Dharmage SC.	Acta Paediatr. 2015 Dec;104(467):38-53. doi: 10.1111/apa.13132.		Acta Paediatr	2015	10.1111/apa.13132	PubMED	High income, middle-income and low income countries													1		1											1
Luan NN	Breastfeeding and ovarian cancer risk: a meta-analysis of epidemiologic studies	Luan NN, Wu QJ, Gong TT, Vogtmann E, Wang YL, Lin B.	Am J Clin Nutr. 2013 Oct;98(4):1020-31. doi: 10.3945/ajcn.113.062794. Epub 2013 Aug 21.		Am J Clin Nutr	2013	10.3945/ajcn.113.062794	PubMED	Unknown																										1													1
Lutter CK	Growth and complementary feeding in the Americas	Lutter CK.	Nutr Metab Cardiovasc Dis. 2012 Oct;22(10):806-12. doi: 10.1016/j.numecd.2012.07.004. Epub 2012 Aug 20.		Nutr Metab Cardiovasc Dis	2012	10.1016/j.numecd.2012.07.004	PubMED	Latin America and the Carribean									1																	1
Ma S	Metabolic effects of breastfeed in women with prior gestational diabetes mellitus: A systematic review and meta-analysis	Ma S, Hu S, Liang H, Xiao Y, Tan H.	Diabetes Metab Res Rev. 2019 Mar;35(3):e3108. doi: 10.1002/dmrr.3108. Epub 2019 Jan 7.		Diabetes Metab Res Rev	2019	10.1002/dmrr.3108	PubMED	Unknown																										1														1
Ma X	Association between breastfeeding and risk of endometrial cancer: a meta-analysis of epidemiological studies	Ma X, Zhao LG, Sun JW, Yang Y, Zheng JL, Gao J, Xiang YB.	Eur J Cancer Prev. 2018 Mar;27(2):144-151. doi: 10.1097/CEJ.0000000000000186.		Eur J Cancer Prev	2018	10.1097/CEJ.0000000000000186	PubMED	Europe/America/Asia																																					1
Maertens K	Breastfeeding after maternal immunisation during pregnancy: providing immunological protection to the newborn: a review	Maertens K, De Schutter S, Braeckman T, Baerts L, Van Damme P, De Meester I, Leuridan E.	Vaccine. 2014 Apr 1;32(16):1786-92. doi: 10.1016/j.vaccine.2014.01.083. Epub 2014 Feb 13.		Vaccine	2014	10.1016/j.vaccine.2014.01.083	PubMED	USA/Bangladesh/The Gambia/Papua New Guinea/Brazil/Australia																						1
Mameli C	Nutrition in the First 1000 Days: The Origin of Childhood Obesity	Mameli C, Mazzantini S, Zuccotti GV.	Int J Environ Res Public Health. 2016 Aug 23;13(9):838. doi: 10.3390/ijerph13090838.		Int J Environ Res Public Health	2016	10.3390/ijerph13090838	PubMED	Canada/New Zealand/Scotland/USA/Hong Kong/France/UK/Netherlands/Sweden/Germany/Greece/Iran/India									1																	1
Martens PJ	What do Kramer's Baby-Friendly Hospital Initiative PROBIT studies tell us? A review of a decade of research	Martens PJ.	J Hum Lact. 2012 Aug;28(3):335-42. doi: 10.1177/0890334412438264. Epub 2012 May 14.		J Hum Lact	2012	10.1177/0890334412438264	PubMED	Belarus																										1
Martin A	Impact of adherence to WHO infant feeding recommendations on later risk of obesity and non-communicable diseases: systematic review	Martin A, Bland RM, Connelly A, Reilly JJ.	Matern Child Nutr. 2016 Jul;12(3):418-27. doi: 10.1111/mcn.12201. Epub 2015 Aug 11.		Matern Child Nutr	2016	10.1111/mcn.12201	PubMED	N/A									1														1			1
Matheson MC	Understanding the evidence for and against the role of breastfeeding in allergy prevention	Matheson MC, Allen KJ, Tang ML.	Clin Exp Allergy. 2012 Jun;42(6):827-51. doi: 10.1111/j.1365-2222.2011.03925.x.		Clin Exp Allergy	2012	10.1111/j.1365-2222.2011.03925.x	PubMED	Italy/Finland/Isle of Wight/Germany/Sweden/Australia													1													1
Mazzocchi A	Hormones in Breast Milk and Effect on Infants Growth: A Systematic Review	Alessandra M, Maria L.G, Daniela M, Ludovica L, Paola R, Carlo A, Valentina D.C, Fabio M	Department of clinical sciences and community health. 2019 Aug 9. 11, 1845; doi:10.3390/nu11081845		Nutrients	2019	10.3390/nu11081845	Embase	Unknown																										1
McKinney CM	Feeding Neonates by Cup: A Systematic Review of the Literature	McKinney CM, Glass RP, Coffey P, Rue T, Vaughn MG, Cunningham M.	Matern Child Health J. 2016 Aug;20(8):1620-33. doi: 10.1007/s10995-016-1961-9.		Matern Child Health J	2016	10.1007/s10995-016-1961-9	PubMED	Canada/USA/Turkey/Switzerland/Australia/Brazil/UK/Taiwan/India/Egypt/Sweden																										1
McQueen K	Systematic Review of Newborn Feeding Method and Outcomes Related to Neonatal Abstinence Syndrome	McQueen K, Taylor C, Murphy-Oikonen J.	J Obstet Gynecol Neonatal Nurs. 2019 Jul;48(4):398-407. doi: 10.1016/j.jogn.2019.03.004. Epub 2019 Apr 26.		J Obstet Gynecol Neonatal Nurs	2019	10.1016/j.jogn.2019.03.004	PubMED	Canada/Australia/Norway/US/Scotland																									1	1
Morton S	Interventions to modify the progression to type 2 diabetes mellitus in women with gestational diabetes: a systematic review of literature	Morton S, Kirkwood S, Thangaratinam S.	Curr Opin Obstet Gynecol. 2014 Dec;26(6):476-86. doi: 10.1097/GCO.0000000000000127.		Curr Opin Obstet Gynecol	2014	10.1097/GCO.0000000000000127	PubMED	USA/Germany																																								1
Nagata C	Breastfeeding and breast cancer risk: an evaluation based on a systematic review of epidemiologic evidence among the Japanese population	Nagata C, Mizoue T, Tanaka K, Tsuji I, Tamakoshi A, Wakai K, Matsuo K, Ito H, Sasazuki S, Inoue M, Tsugane S; Research Group for the Development and Evaluation of Cancer Prevention Strategies in Japan.	Jpn J Clin Oncol. 2012 Feb;42(2):124-30. doi: 10.1093/jjco/hyr182. Epub 2011 Dec 30.		Jpn J Clin Oncol	2012	10.1093/jjco/hyr182	PubMED	Japan																										1									1
Neville CE	The relationship between breastfeeding and postpartum weight change--a systematic review and critical evaluation	Neville CE, McKinley MC, Holmes VA, Spence D, Woodside JV.	Int J Obes (Lond). 2014 Apr;38(4):577-90. doi: 10.1038/ijo.2013.132. Epub 2013 Jul 29.		Int J Obes (Lond)	2014	10.1038/ijo.2013.132	PubMED	Canada/US/UK/Denmark/Japan/Taiwan/Hong Kong/The Netherlands/Sweden/Australia																										1
Nguyen B	Breastfeeding and maternal cardiovascular risk factors and outcomes: A systematic review	Nguyen B, Jin K, Ding D.	PLoS One. 2017 Nov 29;12(11):e0187923. doi: 10.1371/journal.pone.0187923. eCollection 2017.		PLoS One	2017	10.1371/journal.pone.0187923	PubMED	US/Korea/Iran/Portugal/Norway/China/Belarus/Australia																			1
Obbagy JE	Complementary feeding and food allergy, atopic dermatitis/eczema, asthma, and allergic rhinitis: a systematic review	Obbagy JE, English LK, Wong YP, Butte NF, Dewey KG, Fleischer DM, Fox MK, Greer FR, Krebs NF, Scanlon KS, Stoody EE.	Am J Clin Nutr. 2019 Mar 1;109(Suppl_7):890S-934S. doi: 10.1093/ajcn/nqy220.		Am J Clin Nutr	2019	10.1093/ajcn/nqy220	PubMED	UK/Sweden/Finland/USA/Taiwan/Mexico/New Zealand/Germany/Scotland/Netherlands/Malaysia/Australia/Hong Kong/Austria/France/Switzerland/Italy/Japan/Denmark/Belgium/Norway/Brazil													1		1															1
Oyetunji A	Postpartum stress and infant outcome: A review of current literature	Oyetunji A, Chandra P.	Psychiatry Res. 2020 Feb;284:112769. doi: 10.1016/j.psychres.2020.112769. Epub 2020 Jan 9.		Psychiatry Res	2020	10.1016/j.psychres.2020.112769	PubMED	Unknown
Pan H	Reproductive factors and breast cancer risk among BRCA1 or BRCA2 mutation carriers: results from ten studies	Pan H, He Z, Ling L, Ding Q, Chen L, Zha X, Zhou W, Liu X, Wang S.	Cancer Epidemiol. 2014 Feb;38(1):1-8. doi: 10.1016/j.canep.2013.11.004. Epub 2013 Dec 12.		Cancer Epidemiol	2014	10.1016/j.canep.2013.11.004	PubMED	Unknown																																			1
Papoutsakis C	Childhood overweight/obesity and asthma: is there a link? A systematic review of recent epidemiologic evidence	Papoutsakis C, Priftis KN, Drakouli M, Prifti S, Konstantaki E, Chondronikola M, Antonogeorgos G, Matziou V.	J Acad Nutr Diet. 2013 Jan;113(1):77-105. doi: 10.1016/j.jand.2012.08.025.		J Acad Nutr Diet	2013	10.1016/j.jand.2012.08.025	PubMED	Canada/Italy/US/Iran/Brazil/Korea/Japan/Taiwan/Mexico/UK/China/Greece/Australia/Spain									1						1
Park EH	Association Between Breastfeeding and Childhood Breathing Patterns: A Systematic Review and Meta-Analysis	Park EH, Kim JG, Yang YM, Jeon JG, Yoo JI, Kim JK, Lee DW.	Breastfeed Med. 2018 May;13(4):240-247. doi: 10.1089/bfm.2017.0222. Epub 2018 Apr 2.		Breastfeed Med	2018	10.1089/bfm.2017.0222	PubMED	Brazil														1												1
Pearce J	Timing of the introduction of complementary feeding and risk of childhood obesity: a systematic review	Pearce J, Taylor MA, Langley-Evans SC.	Int J Obes (Lond). 2013 Oct;37(10):1295-306. doi: 10.1038/ijo.2013.99. Epub 2013 May 27.		Int J Obes (Lond)	2013	10.1038/ijo.2013.99	PubMED	Canada/US/UK/Europe/Palestine/Denmark/Australia/Brazil/									1																	1
Pearce J	The types of food introduced during complementary feeding and risk of childhood obesity: a systematic review	Pearce J, Langley-Evans SC.	Int J Obes (Lond). 2013 Apr;37(4):477-85. doi: 10.1038/ijo.2013.8. Epub 2013 Feb 12.		Int J Obes (Lond)	2013	10.1038/ijo.2013.8	PubMED	Iceland/Germany/Palestine/Brazil/Denmark/UK									1																	1
Peñacoba C	Associations Between Breastfeeding and Mother-Infant Relationships: A Systematic Review	Peñacoba C, Catala P.	Breastfeed Med. 2019 Nov;14(9):616-629. doi: 10.1089/bfm.2019.0106. Epub 2019 Aug 19.		Breastfeed Med	2019	10.1089/bfm.2019.0106	PubMED	Jordan/Turkey/US/Croatia/Israel/Poland/Denmark/UK/China/Australia/Netherlands																										1
Penny F	Cup Feeding as a Supplemental, Alternative Feeding Method for Preterm Breastfed Infants: An Integrative Review	Penny F, Judge M, Brownell E, McGrath JM.	Matern Child Health J. 2018 Nov;22(11):1568-1579. doi: 10.1007/s10995-018-2632-9.		Matern Child Health J	2018	10.1007/s10995-018-2632-9	PubMED	Egypt/Australia/US/UK/India/Brazil/Turkey																										1
Pereira PF	Does breastfeeding influence the risk of developing diabetes mellitus in children? A review of current evidence	Pereira PF, Alfenas Rde C, Araújo RM.	J Pediatr (Rio J). 2014 Jan-Feb;90(1):7-15. doi: 10.1016/j.jped.2013.02.024. Epub 2013 Oct 16.		J Pediatr (Rio J)	2014	10.1016/j.jped.2013.02.024	PubMED	Cuba/Brazil/Germany/England/Scotland/Wales/Northern Ireland												1														1
Peres KG	Effect of breastfeeding on malocclusions: a systematic review and meta-analysis	Peres KG, Cascaes AM, Nascimento GG, Victora CG.	Acta Paediatr. 2015 Dec;104(467):54-61. doi: 10.1111/apa.13103.		Acta Paediatr	2015	10.1111/apa.13103	PubMED	high income and low/middle-income countries											1															1
Perez-Escamilla R	Impact of the Baby-friendly Hospital Initiative on breastfeeding and child health outcomes: a systematic review	Rafael Perez-Escamilla, Josefa L. Martinez and Sofia Segura-Perez	John Wiley & Sons Ltd Maternal & Child Nutrition (2016), 12, pp. 402–417		Maternal & Child Nutrition	2016	10.1111/mcn.12294	Embase	US/Brazil/Chile/Croatia/India/Italy/Spain/Turkey/UK																								1		1
Pieścik-Lech M	Systematic Review: Early Infant Feeding and the Risk of Type 1 Diabetes	Pieścik-Lech M, Chmielewska A, Shamir R, Szajewska H.	J Pediatr Gastroenterol Nutr. 2017 Mar;64(3):454-459. doi: 10.1097/MPG.0000000000001293.		J Pediatr Gastroenterol Nutr	2017	10.1097/MPG.0000000000001293	PubMED	USA/Norway/Australia/Sweden/Germany												1														1
Pinho-Gomes A-C	Association of lactation with maternal risk of type 2 diabetes: A systematic review and meta-analysis of observational studies	Pinho-Gomes A-C, Morelli G, Jones A, Woodward M	Pinho‐Gomes, A. C., Morelli, G., Jones, A., & Woodward, M. (2021). Association of lactation with maternal risk of type 2 diabetes–a systematic review and meta‐analysis of observational studies. Diabetes, Obesity and Metabolism.		Diabetes, Obesity and Metabolism	2021	10.1111/dom.14417	PubMED	United States, Australia, Ireland, Germany, China, South Korea, Canada, Belgium, Mexico, Italy																																								1
Pinto-Sánchez MI	Gluten Introduction to Infant Feeding and Risk of Celiac Disease: Systematic Review and Meta-Analysis	Pinto-Sánchez MI, Verdu EF, Liu E, Bercik P, Green PH, Murray JA, Guandalini S, Moayyedi P.	J Pediatr. 2016 Jan;168:132-43.e3. doi: 10.1016/j.jpeds.2015.09.032. Epub 2015 Oct 21.		J Pediatr	2016	10.1016/j.jpeds.2015.09.032	PubMED	US/Germany/Sweden/Norway/Italy/UK/Ireland																		1								1
Ponce-Garcia C	Association between Breast Feeding and Paediatric Sleep Disordered Breathing: a Systematic Review	Ponce-Garcia C, Hernandez IA, Major P, Flores-Mir C.	Paediatr Perinat Epidemiol. 2017 Jul;31(4):348-362. doi: 10.1111/ppe.12372. Epub 2017 Jun 7.		Paediatr Perinat Epidemiol	2017	10.1111/ppe.12372	PubMED	Australia/US/UK/China														1												1
Qasem W	Age of introduction of first complementary feeding for infants: a systematic review	Qasem W, Fenton T, Friel J.	BMC Pediatr. 2015 Sep 2;15:107. doi: 10.1186/s12887-015-0409-5.		BMC Pediatr	2015	10.1186/s12887-015-0409-5	PubMED	Honduras/Iceland/Iran																										1
Qiao J	A Meta-Analysis of the Association Between Breastfeeding and Early Childhood Obesity	Qiao, J., Dai, L. J., Zhang, Q., & Ouyang, Y. Q.	Qiao, J., Dai, L. J., Zhang, Q., & Ouyang, Y. Q. (2020). A Meta-Analysis of the Association Between Breastfeeding and Early Childhood Obesity. Journal of pediatric nursing, 53, 57–66. https://doi.org/10.1016/j.pedn.2020.04.024		Journal of paediatric nursing	2020	10.1016/j.pedn.2020.04.024	PubMED	United States/Kuwait/Brazil/Great Britain/Australia/Norway/Sweden/Spain/Germany/China									1
Qu G	Association Between Duration of Breastfeeding and Maternal Hypertension: A Systematic Review and Meta-Analysis	Qu G, Wang L, Tang X, Wu W, Sun Y.	Breastfeed Med. 2018 Jun;13(5):318-326. doi: 10.1089/bfm.2017.0180. Epub 2018 Apr 26.		Breastfeed Med	2018	10.1089/bfm.2017.0180	PubMED	China/US/Norway/Korea																			1							1
Quigley et al	Formula versus donor breast milk for feeding preterm or low birth weight infants	Quigley M, Embleton N.D, McGuire W	Cochrane Database of Systematic Reivews. 2019. 7. DOI:10.1002/14651858.CD002971.pub5.		Cochrane Systematic Review - Intervention	2019	10.1002/14651858.CD002971.pub5.	Cochrane Database of Systematic Reviews	high-income countries					1				1																	1
Rameez RM	Association of Maternal Lactation With Diabetes and Hypertension: A Systematic Review and Meta-analysis	Rameez RM, Sadana D, Kaur S, Ahmed T, Patel J, Khan MS, Misbah S, Simonson MT, Riaz H, Ahmed HM.	JAMA Netw Open. 2019 Oct 2;2(10):e1913401. doi: 10.1001/jamanetworkopen.2019.13401.		JAMA Netw Open	2019	10.1001/jamanetworkopen.2019.13401	PubMED	China/Korea/Australia/US																			1																					1
Rudant J	Childhood acute lymphoblastic leukemia and indicators of early immune stimulation: a Childhood Leukemia International Consortium study	Rudant J, Lightfoot T, Urayama KY, Petridou E, Dockerty JD, Magnani C, Milne E, Spector LG, Ashton LJ, Dessypris N, Kang AY, Miller M, Rondelli R, Simpson J, Stiakaki E, Orsi L, Roman E, Metayer C, Infante-Rivard C, Clavel J.	Am J Epidemiol. 2015 Apr 15;181(8):549-62. doi: 10.1093/aje/kwu298. Epub 2015 Mar 1.		Am J Epidemiol	2015	10.1093/aje/kwu298	PubMED	Canada/Australia/France/Greece/Italy/New Zealand/UK/US																	1				1											1
Sankar MJ	Optimal breastfeeding practices and infant and child mortality: a systematic review and meta-analysis	Sankar MJ, Sinha B, Chowdhury R, Bhandari N, Taneja S, Martines J, Bahl R.	Acta Paediatr. 2015 Dec;104(467):3-13. doi: 10.1111/apa.13147.		Acta Paediatr	2015	10.1111/apa.13147	PubMED	Bangladesh/Ghana/India/Peru/Gambia/Senegal/Pakistan/Guinea Bissau/Brazil/Philippines										1																1
Santiago ACT	Breastfeeding in children born small for gestational age and future nutritional and metabolic outcomes: a systematic review	Santiago ACT, Cunha LPMD, Vieira NSA, Oliveira Moreira LM, Oliveira PR, Lyra PPR, Alves CAD.	J Pediatr (Rio J). 2019 May-Jun;95(3):264-274. doi: 10.1016/j.jped.2018.06.013. Epub 2018 Aug 21.		J Pediatr (Rio J)	2019	10.1016/j.jped.2018.06.013	PubMED	England/India/Spain																										1
Shah PS	Breastfeeding or breast milk for procedural pain in neonates	Shah PS, Herbozo C, Aliwalas LL, Shah VS.	Cochrane Database Syst Rev. 2012 Dec 12;12:CD004950. doi: 10.1002/14651858.CD004950.pub3.		Cochrane Database Syst Rev	2012	10.1002/14651858.CD004950.pub3	PubMED	Unknown																										1		1
Shen J	No direct correlation between rotavirus diarrhea and breast feeding: A meta-analysis	Shen J, Zhang BM, Zhu SG, Chen JJ.	Pediatr Neonatol. 2018 Apr;59(2):129-135. doi: 10.1016/j.pedneo.2017.06.002. Epub 2017 Aug 26.		Pediatr Neonatol	2018	10.1016/j.pedneo.2017.06.002	PubMED	India/Turkey/Uganda/Brazil/Indonesia/Egypt/USA/Burkina Faso/Nigeria/Bangladesh/Italy/	1																						1			1
Silano M	Infant feeding and risk of developing celiac disease: a systematic review	Silano M, Agostoni C, Sanz Y, Guandalini S.	BMJ Open. 2016 Jan 25;6(1):e009163. doi: 10.1136/bmjopen-2015-009163.		BMJ Open	2016	10.1136/bmjopen-2015-009163	PubMED	Europe/Italy/Sweden/Germany/UK/Norway/Netherlands/USA																		1								1
Smith ER	Delayed breastfeeding initiation and infant survival: A systematic review and meta-analysis	Smith ER, Hurt L, Chowdhury R, Sinha B, Fawzi W, Edmond KM; Neovita Study Group.	PLoS One. 2017 Jul 26;12(7):e0180722. doi: 10.1371/journal.pone.0180722. eCollection 2017.		PLoS One	2017	10.1371/journal.pone.0180722	PubMED	high income and low/middle income countries, including India/Ghana/Tanzania/Nepal/Malawi	1	1							1	1										1	1		1	1		1								1
Smith HA	Early additional food and fluids for healthy breastfed full‐term infants	Smith H.A, Becker G.E	Cochrane Database of Systematic Reivews. 2016. 8. DOI: 10.1002/14651858.CD006462.pub4.		Cochrane Systematic Review - Intervention	2016	10.1002/14651858.CD006462.pub4.	Cochrane Database of Systematic Reviews	US/Spain/Nigeria/UK/Sweden/Czech Republic/Iceland/England and Wales																										1
Sun K	Breastfeeding and risk of habitual snoring in children: A meta-analysis	Sun K, Guo Y, Zhang Y, Jiang X.	Matern Child Nutr. 2019 Jul;15(3):e12799. doi: 10.1111/mcn.12799. Epub 2019 Mar 15.		Matern Child Nutr	2019	10.1111/mcn.12799	PubMED	Singapore/US/Australia/Asia Pacific/China/UK														1												1
Sung HK	The Effect of Breastfeeding Duration and Parity on the Risk of Epithelial Ovarian Cancer: A Systematic Review and Meta-analysis	Sung HK, Ma SH, Choi JY, Hwang Y, Ahn C, Kim BG, Kim YM, Kim JW, Kang S, Kim J, Kim TJ, Yoo KY, Kang D, Park S.	Journal of Preventive Medicine and Public Health (2016). 49:349-366. 10.3961/jpmph.16.066		Journal of Preventive Medicine and Public Health	2016	10.3961/jpmph.16.066	Embase	North America/Europe/Asia/Australia/Africa																										1													1
Szajewska H	Systematic review with meta-analysis: early infant feeding and coeliac disease--update 2015	Szajewska H, Shamir R, Chmielewska A, Pieścik-Lech M, Auricchio R, Ivarsson A, Kolacek S, Koletzko S, Korponay-Szabo I, Mearin ML, Ribes-Koninckx C, Troncone R; PREVENTCD Study Group.	Aliment Pharmacol Ther. 2015 Jun;41(11):1038-54. doi: 10.1111/apt.13163. Epub 2015 Mar 26.		Aliment Pharmacol Ther	2015	10.1111/apt.13163	PubMED	EU countries/Israel/Italy/USA/Germany																		1
Szajewska H	Systematic review: early infant feeding and the prevention of coeliac disease	Szajewska H, Chmielewska A, Pieścik-Lech M, Ivarsson A, Kolacek S, Koletzko S, Mearin ML, Shamir R, Auricchio R, Troncone R; PREVENTCD Study Group.	Aliment Pharmacol Ther. 2012 Oct;36(7):607-18. doi: 10.1111/apt.12023. Epub 2012 Aug 21.		Aliment Pharmacol Ther	2012	10.1111/apt.12023	PubMED	Unknown																		1								1
Ter Borg S	Food Consumption, Nutrient Intake and Status during the First 1000 days of Life in the Netherlands: a Systematic Review	Ter Borg S, Koopman N, Verkaik-Kloosterman J.	Nutrients. 2019 Apr 16;11(4):860. doi: 10.3390/nu11040860.		Nutrients	2019	10.3390/nu11040860	PubMED	The Netherlands																										1
Tham R	Breastfeeding and the risk of dental caries: a systematic review and meta-analysis	Tham R, Bowatte G, Dharmage SC, Tan DJ, Lau MX, Dai X, Allen KJ, Lodge CJ.	Acta Paediatr. 2015 Dec;104(467):62-84. doi: 10.1111/apa.13118.		Acta Paediatr	2015	10.1111/apa.13118	PubMED	Canada (Vietnamese migrants)/Brazil/US/Belarus/Finland/UK/Japan/Thailand/Burma/India/Tanzania/South Africa/Italy/Northern Philippines/China/Nigeria/Sweden/Singapore/Greece/Bangladesh/Australia/Jerusalem/Uganda/Sri Lanka/Jordan/Syria/Lithuania/											1															1
Thomaz EBAF	Breastfeeding Versus Bottle Feeding on Malocclusion in Children: A Meta-Analysis Study	Thomaz EBAF, Alves CMC, Gomes E Silva LF, Ribeiro de Almeida CCC, Soares de Britto E Alves MTS, Hilgert JB, Wendland EM.	J Hum Lact. 2018 Nov;34(4):768-788. doi: 10.1177/0890334418755689. Epub 2018 Mar 29.		J Hum Lact	2018	10.1177/0890334418755689	PubMED	India/Spain/Brazil/Venezuela/US/China/Senegal/Croatia/Finland/Argentina/Puerto Rico/Peru/Slovenia/Poland/Cuba/Italy/											1															1
Thompson JMD	Duration of Breastfeeding and Risk of SIDS: An Individual Participant Data Meta-analysis	Thompson JMD, Tanabe K, Moon RY, Mitchell EA, McGarvey C, Tappin D, Blair PS, Hauck FR.	Pediatrics. 2017 Nov;140(5):e20171324. doi: 10.1542/peds.2017-1324.		Pediatrics	2017	10.1542/peds.2017-1324	PubMED	New Zealand/Germany/Scotland/US/Europe/Ireland/England								1																		1
Togo A	Repertoire of human breast and milk microbiota: a systematic review	Togo A, Dufour JC, Lagier JC, Dubourg G, Raoult D, Million M.	Future Microbiol. 2019 May;14:623-641. doi: 10.2217/fmb-2018-0317. Epub 2019 Apr 26.		Future Microbiol	2019	10.2217/fmb-2018-0317	PubMED	Canada/US/India/Spain/UK/France/New Zealand/Argentina/Germany/Turkey/Australia/China/Japan/Kuwait/Belgium/Brazil/Colombia/Czech Republic/Denmark/Greece/Iran/Israel/Italy/Mexico/Pakistan/Qatar/Russia/Saudia Arabia/Singapore/Taiwan/The Netherlands/Yugoslavia/Sweden/Slovenia/Serbia/Norway/Neapl/Mozambique/Malaysia/Korea/Kenya/Ireland/Estonia/Chile/Austria/Switzerland/Nigeria/Czehcoslovakia/Taiwan/Ru…																										1						1
Tørris C	Duration of Lactation and Maternal Risk of Metabolic Syndrome: A Systematic Review and Meta-Analysis	Tørris, C., & Bjørnnes, A. K.	Tørris, C., & Bjørnnes, A. K. (2020). Duration of Lactation and Maternal Risk of Metabolic Syndrome: A Systematic Review and Meta-Analysis. Nutrients, 12(9), 2718. https://doi.org/10.3390/nu12092718		Nutrients	2020	10.3390/nu12092718	PubMED	US/Iran/Korea/
Tseng PT	Maternal breastfeeding and autism spectrum disorder in children: A systematic review and meta-analysis	Tseng PT, Chen YW, Stubbs B, Carvalho AF, Whiteley P, Tang CH, Yang WC, Chen TY, Li DJ, Chu CS, Yang WC, Liang HY, Wu CK, Yen CF, Lin PY.	Nutr Neurosci. 2019 May;22(5):354-362. doi: 10.1080/1028415X.2017.1388598. Epub 2017 Oct 18.		Nutr Neurosci	2019	10.1080/1028415X.2017.1388598	PubMED	Turkey/USA/India							1																			1
Tseng PT	Maternal breastfeeding and attention-deficit/hyperactivity disorder in children: a meta-analysis	Tseng PT, Yen CF, Chen YW, Stubbs B, Carvalho AF, Whiteley P, Chu CS, Li DJ, Chen TY, Yang WC, Tang CH, Liang HY, Yang WC, Wu CK, Lin PY.	Eur Child Adolesc Psychiatry. 2019 Jan;28(1):19-30. doi: 10.1007/s00787-018-1182-4. Epub 2018 Jun 15.		Eur Child Adolesc Psychiatry	2019	10.1007/s00787-018-1182-4	PubMED	Denmark/Turkey/USA/South Africa/Czech/Israel/Germany/Poland						1																				1
Turner S	Breastfeeding and the Development of Socio-Emotional Competencies: A Systematic Review	Turner S, Mayumi Maruyama J, Matijasevich A, Pastor-Valero M.	Breastfeed Med. 2019 Dec;14(10):691-704. doi: 10.1089/bfm.2019.0147. Epub 2019 Oct 29.		Breastfeed Med	2019	10.1089/bfm.2019.0147	PubMED	Canada/Uganda/Burkina Faso/US/UK/China/Ireland/Belarus/Norway/						1																				1
Unar-Munguía M	Breastfeeding Mode and Risk of Breast Cancer: A Dose-Response Meta-Analysis	Unar-Munguía M, Torres-Mejía G, Colchero MA, González de Cosío T.	J Hum Lact. 2017 May;33(2):422-434. doi: 10.1177/0890334416683676. Epub 2017 Feb 14.		J Hum Lact	2017	10.1177/0890334416683676	PubMED	Africa/Asia/Europe/Latin America/US																										1									1
Vail B	Age at Weaning and Infant Growth: Primary Analysis and Systematic Review	Vail B, Prentice P, Dunger DB, Hughes IA, Acerini CL, Ong KK.	J Pediatr. 2015 Aug;167(2):317-24.e1. doi: 10.1016/j.jpeds.2015.05.003. Epub 2015 Jun 12.		J Pediatr	2015	10.1016/j.jpeds.2015.05.003	PubMED	Canada/Iceland/US/The Netherlands/Europe/Australia/UK/Ireland/Norway/Denmark/Scotland/Finland/									1																	1
van Wattum JJ	Antibiotics and lactation: An overview of relative infant doses and a systematic assessment of clinical studies	van Wattum JJ, Leferink TM, Wilffert B, Ter Horst PGJ.	Basic Clin Pharmacol Toxicol. 2019 Jan;124(1):5-17. doi: 10.1111/bcpt.13098. Epub 2018 Sep 7.		Basic Clin Pharmacol Toxicol	2019	10.1111/bcpt.13098	PubMED	Unknown																										1						1
Ventura AK	Associations between Breastfeeding and Maternal Responsiveness: A Systematic Review of the Literature	Ventura AK.	Adv Nutr. 2017 May 15;8(3):495-510. doi: 10.3945/an.116.014753. Print 2017 May.		Adv Nutr	2017	10.3945/an.116.014753	PubMED	developed/high-income countries									1																	1
Verduci E	Nutrition in the first 1000 days and respiratory health: A descriptive review of the last five years' literature	Verduci E, Martelli A, Miniello VL, Landi M, Mariani B, Brambilla M, Diaferio L, Peroni DG.	Allergol Immunopathol (Madr). 2017 Jul-Aug;45(4):405-413. doi: 10.1016/j.aller.2017.01.003. Epub 2017 Apr 12.		Allergol Immunopathol (Madr)	2017	10.1016/j.aller.2017.01.003	PubMED	unknown		1																								1
Villamor-Martínez E	Donor Human Milk Protects against Bronchopulmonary Dysplasia: A Systematic Review and Meta-Analysis	Villamor-Martínez E, Pierro M, Cavallaro G, Mosca F, Kramer BW, Villamor E.	Nutrients. 2018 Feb 20;10(2):238. doi: 10.3390/nu10020238.		Nutrients	2018	10.3390/nu10020238	PubMED	Unknown		1																								1
Waidyatillake NT	The impact of breastfeeding on lung development and function: a systematic review	Waidyatillake NT, Allen KJ, Lodge CJ, Dharmage SC, Abramson MJ, Simpson JA, Lowe AJ.	Expert Rev Clin Immunol. 2013 Dec;9(12):1253-65. doi: 10.1586/1744666X.2013.851005.		Expert Rev Clin Immunol	2013	10.1586/1744666X.2013.851005	PubMED	UK/Sweden/USA/International															1											1
Walker KF	Maternal transmission of SARS-COV-2 to the neonate, and possible routes for such transmission: a systematic review and critical analysis	Walker KF, O'Donoghue K, Grace N, Dorling J, Comeau JL, Li W, Thornton JG.	BJOG. 2020 Oct;127(11):1324-1336. doi: 10.1111/1471-0528.16362. Epub 2020 Jul 22.		BJOG	2020	10.1111/1471-0528.16362	PubMED	Canada/China/USA/Europe/Honduras/Korea/Australia/Peru/UK/Iran																							1										1
Wang BJ	Hormonal and reproductive factors and risk of esophageal cancer in women: a meta-analysis	Wang BJ, Zhang B, Yan SS, Li ZC, Jiang T, Hua CJ, Lu L, Liu XZ, Zhang DH, Zhang RS, Wang X.	Dis Esophagus. 2016 Jul;29(5):448-54. doi: 10.1111/dote.12349. Epub 2015 Mar 23.		Dis Esophagus	2016	10.1111/dote.12349	PubMED	Iran/Sweden/UK/China/USA/Europe/Italy/Switzerland																																				1
Wang KL	Breastfeeding and the risk of childhood Hodgkin lymphoma: a systematic review and meta-analysis	Wang KL, Liu CL, Zhuang Y, Qu HY.	Asian Pac J Cancer Prev. 2013;14(8):4733-7. doi: 10.7314/apjcp.2013.14.8.4733.		Asian Pac J Cancer Prev	2013	10.7314/apjcp.2013.14.8.4733	PubMED	North America/Asia/Europe																	1									1
Wang L	Association between Breastfeeding and Endometrial Cancer Risk: Evidence from a Systematic Review and Meta-Analysis	Wang L, Li J, Shi Z.	Nutrients. 2015 Jul 14;7(7):5697-711. doi: 10.3390/nu7075248.		Nutrients	2015	10.3390/nu7075248	PubMED	United States/Poland/Denmark/France/Germany/Greece/Italy/The Netherlands/Norway/Spain/Sweden/UK/Japan/Australia/Israel/Chile/China/Philippines/Thailand/Mexico																										1											1
Weng SF	Systematic review and meta-analyses of risk factors for childhood overweight identifiable during infancy	Weng SF, Redsell SA, Swift JA, Yang M, Glazebrook CP.	Arch Dis Child. 2012 Dec;97(12):1019-26. doi: 10.1136/archdischild-2012-302263. Epub 2012 Oct 29.		Arch Dis Child	2012	10.1136/archdischild-2012-302263	PubMED	North America/Europe/Australia/South&Central America/Asia									1																	1
Williams LA	A systematic review of infant feeding experience and hospitalisation in developed countries	Williams LA, Davies PS, Boyd R, David M, Ware RS.	Acta Paediatr. 2014 Feb;103(2):131-8. doi: 10.1111/apa.12477. Epub 2013 Dec 5.		Acta Paediatr	2014	10.1111/apa.12477	PubMED	England/Greece/Hong Kong/Australia/Spain																								1		1
Wisnieski L	Breastfeeding and Risk of Metabolic Syndrome in Children and Adolescents: A Systematic Review	Wisnieski L, Kerver J, Holzman C, Todem D, Margerison-Zilko C.	J Hum Lact. 2018 Aug;34(3):515-525. doi: 10.1177/0890334417737038. Epub 2017 Nov 3.		J Hum Lact	2018	10.1177/0890334417737038	PubMED	Estonia/Denmark/Portugal/Iran/Serbia/Spain/Tuinisia/Chile/Belarus/Turkey/China/Israel																			1							1
Wu RK	The Lack of Association of Breastfeeding and Myopia in Children and Adolescents: Finding from a School-Based Study and a Meta-Analysis of the Literature	Wu RK, Liang JH, Zhong H, Li J, Pan CW.	Breastfeed Med. 2019 Oct;14(8):580-586. doi: 10.1089/bfm.2019.0117. Epub 2019 Jul 3.		Breastfeed Med	2019	10.1089/bfm.2019.0117	PubMED	China																										1					1
Xiao H	Association between breastfeeding and osteoporotic hip fracture in women: a dose-response meta-analysis	Xiao H, Zhou Q, Niu G, Han G, Zhang Z, Zhang Q, Bai J, Zhu X.	J Orthop Surg Res. 2020 Jan 16;15(1):15. doi: 10.1186/s13018-019-1541-y.		J Orthop Surg Res	2020	10.1186/s13018-019-1541-y	PubMED	US/Australia/Sweden/China/Norway																										1
Xu L	Systematic review with meta-analysis: breastfeeding and the risk of Crohn's disease and ulcerative colitis	Xu L, Lochhead P, Ko Y, Claggett B, Leong RW, Ananthakrishnan AN.	Aliment Pharmacol Ther. 2017 Nov;46(9):780-789. doi: 10.1111/apt.14291. Epub 2017 Sep 11.		Aliment Pharmacol Ther	2017	10.1111/apt.14291	PubMED	Canada/Italy/Australia/Asia-Pacific/China/Slovakia/US/Denmark/UK/New Zealand/Spain/Germany/France/Japan/Israel/Sweden																							1			1
Yan J	The association between breastfeeding and childhood obesity: a meta-analysis	Yan J, Liu L, Zhu Y, Huang G, Wang PP.	BMC Public Health. 2014 Dec 13;14:1267. doi: 10.1186/1471-2458-14-1267.		BMC Public Health	2014	10.1186/1471-2458-14-1267	PubMED	Canada/Germany/US/UK/Australia/China/Japan/Ireland/Greece/Brazil/The Netherlands/Czech									1																	1
Yi X	Breastfeeding and thyroid cancer risk in women: A dose-response meta-analysis of epidemiological studies	Yi X, Zhu J, Zhu X, Liu GJ, Wu L.	Clin Nutr. 2016 Oct;35(5):1039-46. doi: 10.1016/j.clnu.2015.12.005. Epub 2015 Dec 17.		Clin Nutr	2016	10.1016/j.clnu.2015.12.005	PubMED	France/US/International/French Polynesia/Korea/Poland/Europe/China																										1												1
Zalewski BM	Nutrition of infants and young children (one to three years) and its effect on later health: A systematic review of current recommendations (EarlyNutrition project)	Zalewski BM, Patro B, Veldhorst M, Kouwenhoven S, Crespo Escobar P, Calvo Lerma J, Koletzko B, van Goudoever JB, Szajewska H.	Crit Rev Food Sci Nutr. 2017 Feb 11;57(3):489-500. doi: 10.1080/10408398.2014.888701.		Crit Rev Food Sci Nutr	2017	10.1080/10408398.2014.888701	PubMED	Unknown																										1
Zhou Y	Association between breastfeeding and breast cancer risk: evidence from a meta-analysis	Zhou Y, Chen J, Li Q, Huang W, Lan H, Jiang H.	Breastfeed Med. 2015 Apr;10(3):175-82. doi: 10.1089/bfm.2014.0141. Epub 2015 Mar 18.		Breastfeed Med	2015	10.1089/bfm.2014.0141	PubMED	Turkey/Puerto Rico/China/Europe/Iran/Sweden/India/Sri Lanka/Cyprus/Malaysia/Spain/Africa/Poland/Tunisia																										1									1
	highlighted studies include Canadian data
[truncated: 12 more columns]
