# Supplementary material for: The costs of suboptimal breastfeeding in Ontario, Canada, and potential economic impacts from improving rates: A health system costing analysis
Source: Research Square preprint supplement (doi:10.21203/rs.3.rs-3220814/v1), 2023-08-07
Supplement: Supplementary file 3 [file 8902fccc640b8d2adb303dc6.xlsx]

## Sheet: Sheet1
First Author	Title	Authors	Citation		Journal/Book	Publication Year	DOI	DataBase	Areas covered/Populations	Language	CHILD_GastroInfections	CHILD_Respiratory Infections (Lower & Upper)	CHILD_OtitisMedia	CHILD_Arthritis	CHILD_NecrotisingEnt	CHILD_Cognitive	CHILD_SIDS	CHILD_Obesity/Composition/Growth	CHILD_Mortality	CHILD_Dental	CHILD_Diabetes	CHILD_Allergy	CHILD_Snoring	CHILD_Asthma	CHILD_Handedness	CHILD_Leukaemia	CHILD_Coeliac	CHILD_Cardio	CHILD_Sepsis	CHILD_Infection/Antibiotic Use	CHILD_Vaccine	CHILD_Disease/Morbidity	CHILD_NAS	CHILD_Nutrition	CHILD_Pain	CHILD_Cells	CHILD_Skin/Eczema	CHILD_Eye	CHILD_Gastric Reflux	CHILD_constipation	CHILD_thrush	CHILD_language	CHILD_motor	CHILD_Microbiome	CHILD_Iron Deficiency/Anemia	CHILD_hospitalization	CHILD_behavioural	CHILD_general health	Mother_BreastCancer
Ball GDC	Changes in the prevalence of overweight, obesity, and severe obesity between 2010 and 2017 in preschoolers: A population‐based study	Ball, G. D. C., Savu, A., & Kaul, P.	Ball, G. D. C., Savu, A., & Kaul, P. (2019). Changes in the prevalence of overweight, obesity, and severe obesity between 2010 and 2017 in preschoolers: A population‐based study. Pediatric Obesity, 14(11), N.PAG. https://doi-org.librweb.laurentian.ca/10.1111/ijpo.12561		Pediatric Obesity	2019	10.1111/ijpo.12561	CINAHL	Edmonton & Calgary, Alberta	English								1
Christofides A	Iron deficiency and anemia prevalence and associated etiologic risk factors in First Nations and Inuit communities in Northern Ontario and Nunavut.	Christofides, A., Schauer, C., & Zlotkin, S. H.	Christofides, A., Schauer, C., & Zlotkin, S. H. (2005). Iron deficiency and anemia prevalence and associated etiologic risk factors in First Nations and Inuit communities in Northern Ontario and Nunavut. Canadian Journal of Public Health, 96(4), 304-307.		Canadian Journal of Public Health	2005		CINAHL	Northern Ontario & Nunavut; First Nations & Inuit	English																																			1
Friel JK	Eighteen-month follow-up of infants fed evaporated milk formula	Friel JK, Andrews WL, Edgecombe C, McCloy UR, Belkhode SL, L’Abbe MR, Mercer CN, McDonald AC, Friel, J. K., Andrews, W. L., Edgecombe, C., McCloy, U. R., Belkhode, S. L., L’Abbe, M. R., Mercer, C. N., & McDonald, A. C.	Friel JK, Andrews WL, Edgecombe C, McCloy UR, Belkhode SL, L’Abbe MR, Mercer CN, McDonald AC, Friel, J. K., Andrews, W. L., Edgecombe, C., McCloy, U. R., Belkhode, S. L., L’Abbe, M. R., Mercer, C. N., & McDonald, A. C. (1999). Eighteen-month follow-up of infants fed evaporated milk formula. Canadian Journal of Public Health, 90(4), 240–243.		Canadian Journal of Public Health	1999		CINAHL	St. John's, Newfoundland	English	1	1						1				1								1				1											1	1
Gulick EE	Infant health of mothers with multiple sclerosis	Gulick EE, & Johnson S.	Gulick EE, & Johnson S. (2004). Infant health of mothers with multiple sclerosis. Western Journal of Nursing Research, 26(6), 632–649. https://doi-org.librweb.laurentian.ca/10.1177/0193945904265934		Western Journal of Nursing Research	2004	10.1177/0193945904265934	CINAHL	Canada & United States; mothers with Multiple Sclerosis	English	1	1	1									1		1						1							1	1	1	1	1
Hall WA	Comparison of confidence between mothers who breastfed and formula fed their preterm infants	Hall WA, Shearer K, & Kavanagh R.	Hall WA, Shearer K, & Kavanagh R. (1997). Comparison of confidence between mothers who breastfed and formula fed their preterm infants. Journal of Perinatal & Neonatal Nursing, 11(2), 44–55		Journal of Perinatal & Neonatal Nursing	1997		CINAHL	British Columbia	English
Hossain Z	Fatty Acid Composition in Feeds and Plasma of Canadian Premature Infants.	Hossain, Z., MacKay, D., & Friel, J. K.	Hossain, Z., MacKay, D., & Friel, J. K. (2016). Fatty Acid Composition in Feeds and Plasma of Canadian Premature Infants. Journal of Pediatric Gastroenterology & Nutrition, 63(1), 98–102. https://doi-org.librweb.laurentian.ca/10.1097/MPG.0000000000001134		Journal of Pediatric Gastroenterology & Nutrition	2016	10.1097/MPG.0000000000001134	CINAHL	Canada; premature infants	English						1																										1					1
Martens PJ	Factors associated with newborn in-hospital weight loss: comparisons by feeding method, demographics, and birthing procedures	Martens PJ, & Romphf L.	Martens PJ, & Romphf L. (2007). Factors associated with newborn in-hospital weight loss: comparisons by feeding method, demographics, and birthing procedures. Journal of Human Lactation, 23(3), 233–245. https://doi-org.librweb.laurentian.ca/10.1177/0890334407303888		Journal of Human Lactation	2007	10.1177/0890334407303888	CINAHL	Manitoba, Canada	English								1
O'Connor DL	Effect of Supplemental Donor Human Milk Compared With Preterm Formula on Neurodevelopment of Very Low-Birth-Weight Infants at 18 Months: A Randomized Clinical Trial.	O’Connor. D. L., Gibbins, S., Kiss, A., Bando, N., Brennan-Donnan, J., Ng, E., Campbell, D. M., Vaz, S., Fusch, C., Asztalos, E., Church, P., Kelly, E., Linh Ly, Daneman, A., Unger, S., & Ly, L.	O’Connor. D. L., Gibbins, S., Kiss, A., Bando, N., Brennan-Donnan, J., Ng, E., Campbell, D. M., Vaz, S., Fusch, C., Asztalos, E., Church, P., Kelly, E., Linh Ly, Daneman, A., Unger, S., & Ly, L. (2016). Effect of Supplemental Donor Human Milk Compared With Preterm Formula on Neurodevelopment of Very Low-Birth-Weight Infants at 18 Months: A Randomized Clinical Trial. JAMA: Journal of the American …		JAMA: Journal of the American Medical Association	2016	10.1001/jama.2016.16144	CINAHL	Ontario; very low birth weight infants	English					1	1		1	1													1										1	1
Unger S	DoMINO: Donor milk for improved neurodevelopmental outcomes	Unger, S., Gibbins, S., Zupancic, J., & O’Connor, D. L.	Unger, S., Gibbins, S., Zupancic, J., & O’Connor, D. L. (2014). DoMINO: Donor milk for improved neurodevelopmental outcomes. BMC Pediatrics, 14(1), 123. https://doi-org.librweb.laurentian.ca/10.1186/1471-2431-14-123		BMC Pediatrics	2014	10.1186/1471-2431-14-123	CINAHL	Toronto & Hamilton, Ontario, Canada	English						1		1	1													1		1								1	1
Martens P	Breastfeeding initiation associated with reduced incidence of diabetes in mothers and offspring	Martens, P. J., Shafer, L. A., Dean, H. J., Sellers, E. A., Yamamoto, J., Ludwig, S., ... & McGavock, J.	Martens, P. J., Shafer, L. A., Dean, H. J., Sellers, E. A., Yamamoto, J., Ludwig, S., ... & McGavock, J. (2016). Breastfeeding initiation associated with reduced incidence of diabetes in mothers and offspring. Obstetrics & Gynecology, 128(5), 1095-1104.		Obstetrics & Gynecology	2016	10.1097/AOG.0000000000001689	Google Scholar	Manitoba, Canada	English											1
Abdullah K	Risk factors, practice variation and hematological outcomes of children identified with non-anemic iron deficiency following screening in primary care setting	Abdullah, K., Thorpe, K. E., Maguire, J. L., Birken, C. S., Fehlings, D., Hanley, A. J., & Parkin, P. C.	Abdullah, K., Thorpe, K. E., Maguire, J. L., Birken, C. S., Fehlings, D., Hanley, A. J., & Parkin, P. C. (2015). Risk factors, practice variation and hematological outcomes of children identified with non-anemic iron deficiency following screening in primary care setting. Paediatrics & child health, 20(6), 302-306.		Paediatrics & Child Health	2015		Google Scholar	TARGet Kids!, Canada	English																																			1
Ahmed A	Evaluation of eczema, asthma, allergic rhinitis and allergies among the Grade-1 children of Iqaluit	Ahmed A, Hakim A, Becker A	Ahmed, A., Hakim, A., & Becker, A. (2018). Evaluation of eczema, asthma, allergic rhinitis and allergies among the Grade-1 children of Iqaluit. Allergy, Asthma & Clinical Immunology, 14(1), 9.		Allergy, Asthma & Clinical Immunology	2018	10.1186/s13223-018-0232-2	Google Scholar	Iqualuit, Nunavut	English												1		1													1
Azad MB	Reduced peanut sensitization with maternal peanut consumption and early peanut introduction while breastfeeding.	Azad MB, Dharma C, Simons E, Tran M, Reyna ME, Dai R, Becker AB, Marshall J, Mandhane PJ, Turvey SE, Moraes TJ, Lefebvre DL, Subbarao P, and Sears MR	Azad, M. B., Dharma, C., Simons, E., Tran, M., Reyna, M. E., Dai, R., ... & Sears, M. R. (2020). Reduced peanut sensitization with maternal peanut consumption and early peanut introduction while breastfeeding. Journal of Developmental Origins of Health and Disease, 1-8.		Journal of Developmental Origin of Health and Disease	2020	10.1017/S2040174420001129	Google Scholar	CHILD birth cohort, Canada	English												1
Azad MB	Infant feeding and weight gain: Separating breast milk from breastfeeding and formula from food	Azad, M. B., Vehling, L., Chan, D., Klopp, A., Nickel, N. C., McGavock, J. M., Becker AB, Mandhane PJ, Turvey SE, Moraes TJ, Lefebvre DL, Malcom RS & Taylor, M. S.	Azad, M. B., Vehling, L., Chan, D., Klopp, A., Nickel, N. C., McGavock, J. M., ... & Taylor, M. S. (2018). Infant feeding and weight gain: separating breast milk from breastfeeding and formula from food. Pediatrics, 142(4).		Pediatrics	2018	10.1542/peds.2018-1092	Google Scholar	Edmonton, Toronto, Vancouver, Winnipeg	English								1
Azad MB	Breastfeeding, maternal asthma and wheezing in the first year of life: a longitudinal birth cohort study	Azad, M. B., Vehling, L., Lu, Z., Dai, D., Subbarao, P., Becker, A. B., ... & Sears, M. R.	Azad, M. B., Vehling, L., Lu, Z., Dai, D., Subbarao, P., Becker, A. B., ... & Sears, M. R. (2017). Breastfeeding, maternal asthma and wheezing in the first year of life: a longitudinal birth cohort study. European Respiratory Journal, 49(5), 1602019.		European Respiratory Journal	2017	10.1183/13993003.02019-2016	Google Scholar	Edmonton, Toronto, Vancouver, Winnipeg	English														1
Azad MB	Impact of cesarean section delivery and breastfeeding on infant gut microbiota at one year of age	Azad, M. B., Konya, T., Guttman, D. S., Field, C. J., Chari, R. S., Sears, M. R., ... & Kozyrskyj, A. L.	Azad, M. B., Konya, T., Guttman, D. S., Field, C. J., Chari, R. S., Sears, M. R., ... & Kozyrskyj, A. L. (2014, March). Impact of cesarean section delivery and breastfeeding on infant gut microbiota at one year of age. In Allergy, Asthma & Clinical Immunology (Vol. 10, No. 1, pp. 1-2). BioMed Central.		Allergy, Asthma & Clinical Immunology	2013	10.1186/1710-1492-10-S1-A24	Google Scholar	CHILD Birth Cohort	English																																		1
Borkhoff CM	Breastfeeding to 12 mo and beyond: nutrition outcomes at 3 to 5 y of age	Borkhoff, C. M., Dai, D. W., Jairam, J. A., Wong, P. D., Cox, K. A., Maguire, J. L., ... & Parkin, P. C.	Borkhoff, C. M., Dai, D. W., Jairam, J. A., Wong, P. D., Cox, K. A., Maguire, J. L., ... & Parkin, P. C. (2018). Breastfeeding to 12 mo and beyond: nutrition outcomes at 3 to 5 y of age. The American journal of clinical nutrition, 108(2), 354-362.		American Journal of Clinical Nutrition	2018	10.1093/ajcn/nqy124	Google Scholar	Toronto, Ontario Canada	English																								1
Bridgman SL	Fecal short-chain fatty acid variations by breastfeeding status in infants at 4 months: differences in relative versus absolute concentrations	Bridgman, S. L., Azad, M. B., Field, C. J., Haqq, A. M., Becker, A. B., Mandhane, P. J., ... & CHILD Study Investigators	Bridgman, S. L., Azad, M. B., Field, C. J., Haqq, A. M., Becker, A. B., Mandhane, P. J., ... & CHILD Study Investigators. (2017). Fecal short-chain fatty acid variations by breastfeeding status in infants at 4 months: differences in relative versus absolute concentrations. Frontiers in nutrition, 4, 11.		Frontiers in Nutrition	2017	10.3389/fnut.2017.00011	Google Scholar	CHILD National Birth Cohort, Canada	English																																		1
Bridgman SL	Infant gut immunity: A preliminary study of IgA associations with breastfeeding	Bridgman SL, Konya T, Azad MB, Sears MR, Becker AB, Turvey SE, Mandhane PJ, Subbarao P, CHILD Study Investigators, Scott JA, Field CJ, Kozyrskyj AL	Bridgman, S. L., Konya, T., Azad, M. B., Sears, M. R., Becker, A. B., Turvey, S. E., ... & Kozyrskyj, A. L. (2016). Infant gut immunity: a preliminary study of IgA associations with breastfeeding.		Journal of Developmental Origin of Health and Disease	2016	10.1017/S2040174415007862	Google Scholar	Vancouver, BC & Winnipeg, MB	English																																		1
Brothwell, D	Breastfeeding Is Protective Against Dental Fluorosis in a Nonfluoridated Rural Area of Ontario, Canada	Brothwell D, Limeback H	Brothwell, D., & Limeback, H. (2003). Breastfeeding is protective against dental fluorosis in a nonfluoridated rural area of Ontario, Canada. Journal of Human Lactation, 19(4), 386-390.		Journal of Human Lactation	2003	10.1177/0890334403257935	Google Scholar	Ontario, Canada	English										1
Chaput, K	Breastfeeding difficulties and supports and risk of postpartum depression in a cohort of women who have given birth in Calgary: a prospective cohort study	Chaput K, Nettel-Aguirre A, Musto R, Adair C, Tough S	Chaput, K. H., Nettel-Aguirre, A., Musto, R., Adair, C. E., & Tough, S. C. (2016). Breastfeeding difficulties and supports and risk of postpartum depression in a cohort of womenwho have given birth in Calgary: a prospective cohort study. CMAJ open, 4(1), E103		CMAJ Open	2016	10.9778/cmajo.20150009	Google Scholar	Calgary, Alberta, Canada	English
Cooke-Hubley, S	Spine bone mineral density increases after 6 months of exclusive lactation, even in women who keep breastfeeding	Cooke-Hubley, S., Kirby, B. J., Valcour, J. E., Mugford, G., Adachi, J. D., & Kovacs, C. S	Cooke-Hubley, S., Kirby, B. J., Valcour, J. E., Mugford, G., Adachi, J. D., & Kovacs, C. S. (2017). Spine bone mineral density increases after 6 months of exclusive lactation, even in women who keep breastfeeding. Archives of osteoporosis, 12(1), 73.		Archives of osteoporosis	2017	10.1007/s11657-017-0368-6	Google Scholar	Newfoundland and Ontario	English
Darmawikarta D	The Association Between Total Duration of Breastfeeding and Serum 25-Hydroxyvitamin D	D Darmawikarta, J Maguire, C Birken, P Parkin, G Lebovic, Y Chen	Darmawikarta, D., J Maguire, C Birken, P Parkin, G Lebovic, Y Chen; The Association Between Total Duration of Breastfeeding and Serum 25-Hydroxyvitamin D, Paediatrics & Child Health, Volume 20, Issue 5, 1 June 2015, Pages e86, https://doi.org/10.1093/pch/20.5.e86		Paediatrics & Child Health	2015	10.1093/pch/20.5.e86	Google Scholar	Canada	English																								1
de Bakker, CM	Associations Between Breastfeeding History and Early Postmenopausal Bone Loss.	de Bakker, C. M., Burt, L. A., Gabel, L., Hanley, D. A., & Boyd, S. K.	de Bakker, C. M., Burt, L. A., Gabel, L., Hanley, D. A., & Boyd, S. K. (2020). Associations Between Breastfeeding History and Early Postmenopausal Bone Loss. Calcified Tissue International, 106(3), 264-273.		Calcified Tissue International	2019	10.1007/s00223-019-00638-6	Google Scholar	Calgary, Alberta, Canada	English
DesRoches, A	Peanut allergy: is maternal transmission of antigens during pregnancy and breastfeeding a risk factor?	DesRoches, A., Infante-Rivard, C., Paradis, L., Paradis, J., & Haddad, E.	DesRoches, A., Infante-Rivard, C., Paradis, L., Paradis, J., & Haddad, E. (2010). Peanut allergy: is maternal transmission of antigens during pregnancy and breastfeeding a risk factor?. Journal of Investigational Allergology and Clinical Immunology, 20(4), 289-294.		Journal of Investigational Allergology and Clinical Immunology	2010		Google Scholar	Montreal, Quebec	English												1
Differding M	Potential interaction between timing of infant complementary feeding and breastfeeding duration in determination of early childhood gut microbiota composition and BMI	Differding MK, Doyon M, Bouchard L, Perron P, Guerin R, Asselin C, Masse E, Hivert M-F, Mueller NT	Differding, M. K., Doyon, M., Bouchard, L., Perron, P., Guérin, R., Asselin, C., ... & Mueller, N. T. (2020). Potential interaction between timing of infant complementary feeding and breastfeeding duration in determination of early childhood gut microbiota composition and BMI. Pediatric Obesity, e12642.		Pediatric Obesity	2020	10.1111/ijpo.12642	Google Scholar	Canada	English								1																										1
Dugas C	Impact of Breastfeeding Duration on the Cardiometabolic Risk Profile of Children Born from Mothers with Gestational Diabetes Mellitus Image 14	Dugas, C., Kearney, M., Mercier, R., Perron, J., Tchernof, A., Marc, I., ... & Robitaille, J.	Dugas, C., Kearney, M., Mercier, R., Perron, J., Tchernof, A., Marc, I., ... & Robitaille, J. (2016). Impact of Breastfeeding Duration on the Cardiometabolic Risk Profile of Children Born from Mothers with Gestational Diabetes Mellitus Image 14. Canadian Journal of Diabetes, 40(5), S66.		Canadian Journal of Diabetes	2016	10.1016/j.jcjd.2016.08.188	Google Scholar	Canada	English																		1
Findlay LC	The health of Inuit children under age 6 in Canada.	Findlay, L. C., & Janz, T. A.	Findlay, L. C., & Janz, T. A. (2012). The health of Inuit children under age 6 in Canada. International Journal of Circumpolar Health, 71(1), 18580.		International Journal of Circumpolar Health	2012		Google Scholar	Inuit children	English																																						1
Findlay LC	Health of First Nations children living off reserve and Métis children younger than age 6.	Findlay, L. C., & Janz, T. A.	Findlay, L., & Janz, T. (2012). Health of First Nations children living off reserve and Métis children younger than age 6. Health Reports, 23(1), C1.		Health Reports	2012		Google Scholar	First nations/Metis in Canada	English																																						1
Galazzo G	Development of the microbiota and associations with birth mode, diet, and atopic disorders in a longitudinal analysis of stool samples, collected from infancy through early childhood.	Galazzo, G., van Best, N., Bervoets, L., Dapaah, I. O., Savelkoul, P. H., Hornef, M. W., ... & Penders, J.	Galazzo, G., van Best, N., Bervoets, L., Dapaah, I. O., Savelkoul, P. H., Hornef, M. W., ... & Penders, J. (2020). Development of the microbiota and associations with birth mode, diet, and atopic disorders in a longitudinal analysis of stool samples, collected from infancy through early childhood. Gastroenterology. doi: 10.1053/j.gastro.2020.01.024		Gastroenterology	2020	10.1053/j.gastro.2020.01.024	Google Scholar	unspecified, likley Canada	English																																		1
Guillemette, L	Contrary to Breastfeeding Initiation, High School Completion is Associated with Lower Cardiovascular Risk after Intrauterine Exposure to Diabetes.	Guillemette, L., Wicklow, B., Sellers, E. A., Dart, A., Shen, G. X., Dolinsky, V. W., ... & McGavock, J.	Guillemette, L., Wicklow, B., Sellers, E. A., Dart, A., Shen, G. X., Dolinsky, V. W., ... & McGavock, J. (2018). Contrary to Breastfeeding Initiation, High School Completion is Associated with Lower Cardiovascular Risk after Intrauterine Exposure to Diabetes. Canadian Journal of Diabetes, 42(5), S58.		Canadian Journal of Diabetes	2018	10.1016/j.jcjd.2018.08.178	Google Scholar	Manitoba, Canada	English																		1
Gunaseelan V	Maternal ethnicity and iron status in early childhood in Toronto, Canada: a cross-sectional study	Gunaseelan, V., Parkin, P. C., Wahi, G., Birken, C. S., Maguire, J. L., Macarthur, C., ... & TARGet Kids! Collaboration.	Gunaseelan, V., Parkin, P. C., Wahi, G., Birken, C. S., Maguire, J. L., Macarthur, C., ... & TARGet Kids! Collaboration. (2020). Maternal ethnicity and iron status in early childhood in Toronto, Canada: a cross-sectional study. BMJ Paediatrics Open, 4(1).		BMJ Paediatrics Open	2020	10.1136/bmjpo-2020-000635	Google Scholar	TARGet Kids!; Canada	English																																			1
Halipchuk	Prenatal, obstetric and perinatal factors associated with the development of childhood-onset type 2 diabetes	Halipchuk, J., Temple, B., Dart, A., Martin, D., & Sellers, E. A.	Halipchuk, J., Temple, B., Dart, A., Martin, D., & Sellers, E. A. (2018). Prenatal, obstetric and perinatal factors associated with the development of childhood-onset type 2 diabetes. Canadian Journal of Diabetes, 42(1), 71-77.		Canadian Journal of Diabetes	2018	10.1016/j.jcjd.2017.04.003	Google Scholar	Manitoba, Canada	English											1
Jonas, W	Genetic variation in oxytocin rs2740210 and early adversity associated with postpartum depression and breastfeeding duration	Jonas W, Mileva-Seitz V, Girard AW, Bisceglia R, Kennedy JL, Sokolowski M, Meaney MJ, Fleming AS, Steiner M	Jonas, W., Mileva‐Seitz, V., Girard, A. W., Bisceglia, R., Kennedy, J. L., Sokolowski, M., ... & MAVAN Research Team. (2013). Genetic variation in oxytocin rs2740210 and early adversity associated with postpartum depression and breastfeeding duration. Genes, Brain and Behavior, 12(7), 681-694.		Genes, Brain and Behavior	2013	10.1111/gbb.12069	Google Scholar	Ontario & Quebec	English
Kafouri, S	Breastfeeding and brain structure in adolescence	Kafouri S, Kramer M, Leonard G, Perron M, Pike B, Richer L, Toro R, Veillette S, Pausova Z, Paus T	Kafouri, S., Kramer, M., Leonard, G., Perron, M., Pike, B., Richer, L., ... & Paus, T. (2013). Breastfeeding and brain structure in adolescence. International journal of epidemiology, 42(1), 150-159.		International Journal of Epidemiology	2013	10.1093/ije/dys172	Google Scholar	Quebec, Canada	English						1
Kendall-Tackett K	Depression, sleep quality, and maternal well-being in postpartum women with a history of sexual assault: A comparison of breastfeeding, mixed-feeding and formula-feeding mothers	Kendall-Tackett K, Cong Z, Hale TW	Kendall-Tackett, K., Cong, Z., & Hale, T. W. (2013). Depression, sleep quality, and maternal well-being in postpartum women with a history of sexual assault: A comparison of breastfeeding, mixed-feeding, and formula-feeding mothers. Breastfeeding Medicine, 8(1), 16-22.		Breastfeeding Medicine	2013	10.1089/bfm.2012.0024	Google Scholar	International, including Canada	English
Kheir F	Breastfeeding duration in infancy and dietary intake in childhood and adolescence	Kheir, F., Feeley, N., Maximova, K., Drapeau, V., Henderson, M., & Van Hulst, A.	Kheir, F., Feeley, N., Maximova, K., Drapeau, V., Henderson, M., & Van Hulst, A. (2020). Breastfeeding duration in infancy and dietary intake in childhood and adolescence. Appetite, 158, 104999		Appetite	2020	10.1016/j.appet.2020.104999	Google Scholar	Quebec, Canada	English																								1
Klopp A	Modes of infant feeding and the risk of childhood asthma: a prospective birth cohort study.	Klopp, A., Vehling, L., Becker, A. B., Subbarao, P., Mandhane, P. J., Turvey, S. E., ... & Hayglass, K.	Klopp, A., Vehling, L., Becker, A. B., Subbarao, P., Mandhane, P. J., Turvey, S. E., ... & Hayglass, K. (2017). Modes of infant feeding and the risk of childhood asthma: a prospective birth cohort study. The Journal of pediatrics, 190, 192-199.		The Journal of Pediatrics	2017	10.1016/j.jpeds.2017.07.012	Google Scholar	Toronto, Winnipeg, Edmonton and Vancouver	English														1
Knauer, MJ	Breastfeeding and postpartum ovulation: A research design and some preliminary results	Knauer MJ	KNAUER, M. J. Breastfeeding and Postpartum Ovulation: A Research Design and Some Preliminary Results1. CANADIANREVIEW OF PHYSICAL ANTHROPOLOG Y, 44.		Canadian Review of Physical Anthropology	1981		Google Scholar	Canada	English
Kotsopoulos J	Breastfeeding and the risk of epithelial ovarian cancer among women with a BRCA1 or BRCA2 mutation	Kotsopoulos, J., Gronwald, J., McCuaig, J. M., Karlan, B. Y., Eisen, A., Tung, N., ... & Fruscio, R.	Kotsopoulos, J., Gronwald, J., McCuaig, J. M., Karlan, B. Y., Eisen, A., Tung, N., ... & Fruscio, R. (2020). Breastfeeding and the risk of epithelial ovarian cancer among women with a BRCA1 or BRCA2 mutation. Gynecologic Oncology, 159(3), 820-826.		Gynecologic Oncology	2020	10.1016/j.ygyno.2020.09.037	Google Scholar	International, including Canada	English
Kotsopoulos J	Breastfeeding and the risk of breast cancer in BRCA1 and BRCA2 mutation carriers	Kotsopoulos, J., Lubinski, J., Salmena, L., Lynch, H. T., Kim-Sing, C., Foulkes, W. D., ... & Ainsworth, P.	Kotsopoulos, J., Lubinski, J., Salmena, L., Lynch, H. T., Kim-Sing, C., Foulkes, W. D., ... & Ainsworth, P. (2012). Breastfeeding and the risk of breast cancer in BRCA1 and BRCA2 mutation carriers. Breast cancer research, 14(2), R42.		Breast Cancer Research	2012	10.1186/bcr3138	Google Scholar	International, including Canada	English																																							1
Ma, J	Breastfeeding and childhood obesity: A 12-country study	Ma J, Qiao Y, Zhao P, Li W, Katzmarzyk PT, Chaput JP, Fogelholm M, Kuriyan R, Lambert EV, Maher C, Maia J, Matsudo V, Olds T, Onywera V, Sarmiento OL, Standage M, Tremblay MS, Tudor-Locke C, Hu G,	Ma, J., Qiao, Y., Zhao, P., Li, W., Katzmarzyk, P. T., Chaput, J. P., ... & Maia, J. (2020). Breastfeeding and childhood obesity: A 12‐country study. Maternal & Child Nutrition, e12984.		Maternal & Child Nutrition	2020	10.1111/mcn.12984	Google Scholar	International, including Canada	English								1
Mai, XM	Fast food consumption counters the protective effect of breastfeeding on asthma in children?	Mai, X.-M., Becker, A. B., Liem, J. J., & Kozyrskyj, A. L.	Mai, X.-M., Becker, A. B., Liem, J. J., & Kozyrskyj, A. L. (2009). Fast food consumption counters the protective effect of breastfeeding on asthma in children? Clinical & Experimental Allergy, 39(4), 556–561.		Clinical and Experimental Allergy	2009	10.1111/j.1365-2222.2008.03169.x	Google Scholar	Manitoba, Canada	English														1
McIsaac KE	Breastfeeding as a means to prevent infant morbidity and mortality in Aboriginal Canadians: A population prevented fraction analysis	McIsaac, K. E., Moineddin, R., & Matheson, F. I.	McIsaac, K. E., Moineddin, R., & Matheson, F. I. (2015). Breastfeeding as a means to prevent infant morbidity and mortality in Aboriginal Canadians: A population prevented fraction analysis. Canadian Journal of Public Health, 106(4), e217-e222.		Canadian Journal of Public Health	2015	10.17269/CJPH.106.4855	Google Scholar	Canada	English	1		1				1
Moffat DC	A Population-Based Study of Breastfeeding in Inflammatory Bowel Disease: Initiation, Duration, and Effect on Disease in the Postpartum Period	Moffatt, D. C., Ilnyckyj, A., & Bernstein, C. N.	Moffatt, D. C., Ilnyckyj, A., & Bernstein, C. N. (2009). A Population-Based Study of Breastfeeding in Inflammatory Bowel Disease: Initiation, Duration, and Effect on Disease in the Postpartum Period. The American Journal of Gastroenterology, 104(10), 2517–2523.		The American Journal of Gastroenterology	2009	10.1038/ajg.2009.362	Google Scholar	Manitoba, Canada	English
Pope, C	Breastfeeding and postpartum depression: Assessing the influence of breastfeeding intention an dother risk factors	Pope C, Mazmanian D, Bedard M, Sharma V	Pope, C. J., Mazmanian, D., Bédard, M., & Sharma, V. (2016). Breastfeeding and postpartum depression: Assessing the influence of breastfeeding intention and other risk factors. Journal of Affective Disorders, 200, 45-50		Journal of Affective Disorders	2016	10.1016/j.jad.2016.04.014	Google Scholar	Canada	English
Rippeyoung PLF	Can breastfeeding solve inequality? The relative moderating impact of breastfeeding on poverty gaps in Canadian child cognitive skills	Rippeyoung PL	Rippeyoung, P. L. (2013). Can breastfeeding solve inequality? The relative moderating impact of breastfeeding on poverty gaps in Canadian child cognitive skills. Canadian Journal of Sociology, 38(1), 65-86		Canadian Journal of Sociology	2013		Google Scholar	Canada	English						1
Rossiter MD	Breast, formula and combination feeding in relation to childhood obesity in Nova Scotia, Canada.	Rossiter, M. D., Colapinto, C. K., Khan, M. K., McIsaac, J. L. D., Williams, P. L., Kirk, S. F., & Veugelers, P. J.	Rossiter, M. D., Colapinto, C. K., Khan, M. K., McIsaac, J. L. D., Williams, P. L., Kirk, S. F., & Veugelers, P. J. (2015). Breast, formula and combination feeding in relation to childhood obesity in Nova Scotia, Canada. Maternal and child health journal, 19(9), 2048-2056.		Maternal and Child Health Journal	2015	10.1007/s10995-015-1717-y	Google Scholar	Canada	English								1
Shay M	Maternal psychological distress and child weight at 24 months: investigating indirect effects through breastfeeding in the All Our Families cohort	Shay M, Tomfohr-Madsen L, Tough S	Shay, M., Tomfohr-Madsen, L., & Tough, S. (2020). Maternal psychological distress and child weight at 24 months: investigating indirect effects through breastfeeding in the All Our Families cohort. Canadian Journal of Public Health, 1-12.		Canadian Journal of Public Health	2020	10.17269/s41997-020-00312-7	Google Scholar	Calgary, Alberta, Canada	English								1
Tran MM	The effects of infant feeding practices on food sensitization in a Canadian birth cohort.	Tran, M. M., Dai, W. H., Lefebvre, D. L., Subbarao, P., Becker, A. B., Mandhane, P. J., ... & Sears, M. R	Tran, M. M., Dai, W. H., Lefebvre, D. L., Subbarao, P., Becker, A. B., Mandhane, P. J., ... & Sears, M. R. (2016). The effects of infant feeding practices on food sensitization in a Canadian birth cohort. In D31. NOVEL MECHANISMS OF ALLERGY AND AIRWAY INFLAMMATION (pp. A6694-A6694). American Thoracic Society. https://www.atsjournals.org/doi/pdf/10.1164/ajrccm-conference.2016.193.1_MeetingAbstract…		Am J Respir Crit Care Med	2016	10.1164/ajrccm-conference.2016.193.1_MeetingAbstracts.A6694	Google Scholar	CHILD Cohort, Canada	English												1
Twells L	Can exclusive breastfeeding reduce the likelihood of childhood obesity in some regions of Canada?	Twells L, Newhook LA	Twells, L., & Newhook, L. A. (2010). Can exclusive breastfeeding reduce the likelihood of childhood obesity in some regions of Canada?. Canadian Journal of Public Health, 101(1), 36-39.		Canadian Journal of Public Health	2010		Google Scholar	Newfoundland	English								1
Wong PD	The association of breastfeeding duration and early childhood cardiometabolic risk	Wong, P. D., Anderson, L. N., Dai, D. D., Parkin, P. C., Maguire, J. L., Birken, C. S., Lau E	Wong, P. D., Anderson, L. N., Dai, D. D., Parkin, P. C., Maguire, J. L., Birken, C. S., & Lau E (2018). The association of breastfeeding duration and early childhood cardiometabolic risk. The Journal of pediatrics, 192, 80-85.		The Journal of Pediatrics	2018	10.1016/j.jpeds.2017.09.071	Google Scholar	Toronto, Ontario, Canada	English																		1
Yasmin F	Cesarean section, formula feeding, and infant antibiotic exposure: separate and combined impacts on gut microbial changes in later infancy	Yasmin, F., Tun, H. M., Konya, T. B., Guttman, D. S., Chari, R. S., Field, C. J., ... & CHILD Study Investigators.	Yasmin, F., Tun, H. M., Konya, T. B., Guttman, D. S., Chari, R. S., Field, C. J., ... & CHILD Study Investigators. (2017). Cesarean section, formula feeding, and infant antibiotic exposure: separate and combined impacts on gut microbial changes in later infancy. Frontiers in pediatrics, 5, 200		Frontiers in pediatrics	2017	10.3389/fped.2017.00200	Google Scholar	Winnipeg site of CHILD Study Cohort	English																																		1
Ye M	Association of breastfeeding with asthma in young Aboriginal children in Canada	Ye M, Mandhane P, Senthilselvan A	Ye, M., Mandhane, P. J., & Senthilselvan, A. (2012). Association of breastfeeding with asthma in young Aboriginal children in Canada. Canadian respiratory journal, 19.		Canadian Respiratory Journal	2012		Google Scholar	Canada	English														1
Yu J	Postpartum Breastfeeding and Cardiovascular Risk Assessment in Women Following Pregnancy Complications	Yu, J., Pudwell, J., Dayan, N., & Smith, G. N.	Yu, J., Pudwell, J., Dayan, N., & Smith, G. N. (2020). Postpartum Breastfeeding and Cardiovascular Risk Assessment in Women Following Pregnancy Complications. Journal of Women's Health, 29(5), 627-635		Journal of Women's Health	2020	10.1089/jwh.2019.7894	Google Scholar	Kingston, Ontario, Canada	English
McQueen KA	The impact of infant feeding method on neonatal abstinence scores of methadone-exposed infants	McQueen KA, Murphy-Oikonen J, Gerlach K, Montelpare W.	Adv Neonatal Care. 2011 Aug;11(4):282-90. doi: 10.1097/ANC.0b013e318225a30c.		Adv Neonatal Care	2011	10.1097/ANC.0b013e318225a30c	PubMed	Ontario, Canada	English																							1	1
Ordean A	Obstetrical and neonatal outcomes of methadone-maintained pregnant women: a canadian multisite cohort study	Ordean A, Kahan M, Graves L, Abrahams R, Kim T.	J Obstet Gynaecol Can. 2015 Mar;37(3):252-257. doi: 10.1016/S1701-2163(15)30311-X.		J Obstet Gynaecol Can	2015	10.1016/S1701-2163(15)30311-X	PubMed	Vancouver BC, Toronto ON, Montreal QB	English																							1
Vogel L	Newborns exposed to opioids need mothers more than NICU, say pediatricians	Vogel L.	CMAJ. 2018 Jan 29;190(4):E123-E124. doi: 10.1503/cmaj.109-5550.		CMAJ	2018	10.1503/cmaj.109-5550	PubMed	Did not specify	English																							1
Bajaj H	Prior lactation reduces future diabetic risk through sustained postweaning effects on insulin sensitivity	Bajaj H, Ye C, Hanley AJ, Connelly PW, Sermer M, Zinman B, Retnakaran R.	Am J Physiol Endocrinol Metab. 2017 Mar 1;312(3):E215-E223. doi: 10.1152/ajpendo.00403.2016. Epub 2016 Dec 13.		Am J Physiol Endocrinol Metab	2017	10.1152/ajpendo.00403.2016	PubMed	Canada (did not specify)	English
Albert RJ	Nursing caries in the Inuit children of the Keewatin	Albert RJ, Cantin RY, Cross HG, Castaldi CR.	J Can Dent Assoc. 1988 Oct;54(10):751-8.		J Can Dent Assoc	1988		PubMed	No Article
Alshaikh B	Effect of a Quality Improvement Project to Use Exclusive Mother's Own Milk on Rate of Necrotizing Enterocolitis in Preterm Infants	Alshaikh B, Kostecky L, Blachly N, Yee W.	Breastfeed Med. 2015 Sep;10(7):355-61. doi: 10.1089/bfm.2015.0042. Epub 2015 Jul 31.		Breastfeed Med	2015	10.1089/bfm.2015.0042	PubMed	Calgary, Alberta, Canada	English					1
Ayotte P	Health risk assessment for inuit newborns exposed to dioxin-like compounds through breast feeding	Ayotte P, Carrier G, Dewailly E.	Chemosphere. 1996 Feb;32(3):531-42. doi: 10.1016/0045-6535(96)00003-3.		Chemosphere	1996	10.1016/0045-6535(96)00003-3	PubMed	Quebec, Ontario, Canada	English																								1		1
Azad MB	Infant Feeding and the Developmental Origins of Chronic Disease in the CHILD Cohort: Role of Human Milk Bioactives and Gut Microbiota	Azad MB.	Breastfeed Med. 2019 Apr;14(S1):S22-S24. doi: 10.1089/bfm.2019.0029.		Breastfeed Med	2019	10.1089/bfm.2019.0029	PubMed	Canada (did not specify)	English																						1		1										1
Azad MB	Gut microbiota of healthy Canadian infants: profiles by mode of delivery and infant diet at 4 months	Azad MB, Konya T, Maughan H, Guttman DS, Field CJ, Chari RS, Sears MR, Becker AB, Scott JA, Kozyrskyj AL; CHILD Study Investigators.	CMAJ. 2013 Mar 19;185(5):385-94. doi: 10.1503/cmaj.121189. Epub 2013 Feb 11.		CMAJ	2013	10.1503/cmaj.121189	PubMed	Winnipeg, Manitoba, Canada	English																																		1
Banerji A	Risk factors and viruses associated with hospitalization due to lower respiratory tract infections in Canadian Inuit children : a case-control study	Banerji A, Greenberg D, White LF, Macdonald WA, Saxton A, Thomas E, Sage D, Mamdani M, Lanctôt KL, Mahony JB, Dingle M, Roberts A.	Pediatr Infect Dis J. 2009 Aug;28(8):697-701. doi: 10.1097/INF.0b013e31819f1f89.		Pediatr Infect Dis J	2009	10.1097/INF.0b013e31819f1f89	PubMed	Canada, Nunavut, Iqaluit	English		1																				1
Bayley TM	Longer term effects of early dietary cholesterol level on synthesis and circulating cholesterol concentrations in human infants	Bayley TM, Alasmi M, Thorkelson T, Jones PJ, Corcoran J, Krug-Wispe S, Tsang RC.	Metabolism. 2002 Jan;51(1):25-33. doi: 10.1053/meta.2002.28154.		Metabolism	2002	10.1053/meta.2002.28154	PubMed	Did not specify	English																		1
Bayoumi I	Iron deficiency among low income Canadian toddlers: a cross-sectional feasibility study in a Community Health Centre and non-Community Health Centre sites	Bayoumi I, Parkin PC, Lebovic G, Patel R, Link K, Birken CS, Maguire JL, Borkhoff CM.	BMC Fam Pract. 2018 Sep 24;19(1):161. doi: 10.1186/s12875-018-0848-9.		BMC Fam Pract	2018	10.1186/s12875-018-0848-9	PubMed	Kingston, Ontario, Canada	English																								1
Beaudry M	Relation between infant feeding and infections during the first six months of life	Beaudry M, Dufour R, Marcoux S.	J Pediatr. 1995 Feb;126(2):191-7. doi: 10.1016/s0022-3476(95)70544-9.		J Pediatr	1995	10.1016/s0022-3476(95)70544-9	PubMed	New Brunswick, Canada	English																				1				1
Beaulieu MD	[Epidemiology of breast feeding among mothers in a region of Montreal]	Beaulieu MD, Walop W, Wolfson C.	Union Med Can. 1980 May;109(5):705-13.		Union Med Can	1980		PubMed	No Article
Becker A	The Canadian asthma primary prevention study: outcomes at 2 years of age	Becker A, Watson W, Ferguson A, Dimich-Ward H, Chan-Yeung M.	J Allergy Clin Immunol. 2004 Apr;113(4):650-6. doi: 10.1016/j.jaci.2004.01.754.		J Allergy Clin Immunol	2004	10.1016/j.jaci.2004.01.754	PubMed	Canada	English														1
Bigelow A	Effect of mother/infant skin-to-skin contact on postpartum depressive symptoms and maternal physiological stress	Bigelow A, Power M, MacLellan-Peters J, Alex M, McDonald C.	J Obstet Gynecol Neonatal Nurs. 2012 May-Jun;41(3):369-82. doi: 10.1111/j.1552-6909.2012.01350.x. Epub 2012 Apr 26.		J Obstet Gynecol Neonatal Nurs	2012	10.1111/j.1552-6909.2012.01350.x	PubMed	Eastern Canada	English
Brothwell DJ	Fluorosis risk in grade 2 students residing in a rural area with widely varying natural fluoride	Brothwell DJ, Limeback H.	Community Dent Oral Epidemiol. 1999 Apr;27(2):130-6. doi: 10.1111/j.1600-0528.1999.tb02002.x.		Community Dent Oral Epidemiol	1999	10.1111/j.1600-0528.1999.tb02002.x	PubMed	Canada	English										1
Burnier D	Exclusive breastfeeding duration and later intake of vegetables in preschool children	Burnier D, Dubois L, Girard M.	Eur J Clin Nutr. 2011 Feb;65(2):196-202. doi: 10.1038/ejcn.2010.238. Epub 2010 Oct 27.		Eur J Clin Nutr	2011	10.1038/ejcn.2010.238	PubMed	Quebec, Canada	English																								1
Butcher J	Independent of Birth Mode or Gestational Age, Very-Low-Birth-Weight Infants Fed Their Mothers' Milk Rapidly Develop Personalized Microbiotas Low in Bifidobacterium	Butcher J, Unger S, Li J, Bando N, Romain G, Francis J, Mottawea W, Mack D, Stintzi A, O'Connor DL.	J Nutr. 2018 Mar 1;148(3):326-335. doi: 10.1093/jn/nxx071.		J Nutr	2018	10.1093/jn/nxx071	PubMed	Toronto, Ontario Canada	English																																		1
Casey L	Determinants of Successful Direct Breastfeeding at Hospital Discharge in High-Risk Premature Infants	Casey L, Fucile S, Dow KE.	Breastfeed Med. 2018 Jun;13(5):346-351. doi: 10.1089/bfm.2017.0209. Epub 2018 May 10.		Breastfeed Med	2018	10.1089/bfm.2017.0209	PubMed	Kingston, Ontario, Canada	English																								1
Chalmers B	Breastfeeding unfriendly in Canada?	Chalmers B.	CMAJ. 2013 Mar 19;185(5):375-6. doi: 10.1503/cmaj.121309. Epub 2013 Feb 25.		CMAJ	2013	10.1503/cmaj.121309	PubMed	Canada	English																								1
Clifford TJ	Infant colic: empirical evidence of the absence of an association with source of early infant nutrition	Clifford TJ, Campbell MK, Speechley KN, Gorodzinsky F.	Arch Pediatr Adolesc Med. 2002 Nov;156(11):1123-8. doi: 10.1001/archpedi.156.11.1123.		Arch Pediatr Adolesc Med	2002	10.1001/archpedi.156.11.1123	PubMed	Ontario, Canada	English																		1
Coulibaly R	Links between maternal breast-feeding duration and Québec infants' health: a population-based study. Are the effects different for poor children?	Coulibaly R, Séguin L, Zunzunegui MV, Gauvin L.	Matern Child Health J. 2006 Nov;10(6):537-43. doi: 10.1007/s10995-006-0114-y.		Matern Child Health J	2006	10.1007/s10995-006-0114-y	PubMed	Quebec, Canada	English																								1
Daniels JL	Breast-feeding and neuroblastoma, USA and Canada	Daniels JL, Olshan AF, Pollock BH, Shah NR, Stram DO.	Cancer Causes Control. 2002 Jun;13(5):401-5. doi: 10.1023/a:1015746701922.		Cancer Causes Control	2002	10.1023/a:1015746701922	PubMed	Canada/United States	English																						1
Davis DW	Infant feeding practices and occlusal outcomes: a longitudinal study	Davis DW, Bell PA.	J Can Dent Assoc. 1991 Jul;57(7):593-4.		J Can Dent Assoc	1991		PubMed	No article
Dell S	Breastfeeding and asthma in young children: findings from a population-based study	Dell S, To T.	Arch Pediatr Adolesc Med. 2001 Nov;155(11):1261-5. doi: 10.1001/archpedi.155.11.1261.		Arch Pediatr Adolesc Med	2001	10.1001/archpedi.155.11.1261	PubMed	Canada	English														1
Dewailly E	Susceptibility to infections and immune status in Inuit infants exposed to organochlorines	Dewailly E, Ayotte P, Bruneau S, Gingras S, Belles-Isles M, Roy R.	Environ Health Perspect. 2000 Mar;108(3):205-11. doi: 10.1289/ehp.00108205.		Environ Health Perspect	2000	10.1289/ehp.00108205	PubMed	Inuit/Nunavik	English																				1
Drall KM	Clostridioides difficile Colonization Is Differentially Associated With Gut Microbiome Profiles by Infant Feeding Modality at 3-4 Months of Age	Drall KM, Tun HM, Morales-Lizcano NP, Konya TB, Guttman DS, Field CJ, Mandal R, Wishart DS, Becker AB, Azad MB, Lefebvre DL, Mandhane PJ, Moraes TJ, Sears MR, Turvey SE, Subbarao P, Scott JA, Kozyrskyj AL.	Front Immunol. 2019 Dec 11;10:2866. doi: 10.3389/fimmu.2019.02866. eCollection 2019.		Front Immunol	2019	10.3389/fimmu.2019.02866	PubMed	Vancouver BC, Edmonton Al, Manitoba	English																								1										1
Dubois L	Breast-feeding, day-care attendance and the frequency of antibiotic treatments from 1.5 to 5 years: a population-based longitudinal study in Canada	Dubois L, Girard M.	Soc Sci Med. 2005 May;60(9):2035-44. doi: 10.1016/j.socscimed.2004.08.059. Epub 2004 Nov 13.		Soc Sci Med	2005	10.1016/j.socscimed.2004.08.059	PubMed	Quebec, Canada	English																								1
Eni R	At the edges of embodiment: determinants of breastfeeding for first nations women	Eni R, Phillips-Beck W, Mehta P.	Breastfeed Med. 2014 May;9(4):203-14. doi: 10.1089/bfm.2013.0129. Epub 2014 Mar 7.		Breastfeed Med	2014	10.1089/bfm.2013.0129	PubMed	BC, Manitoba, Ontario (First Nations)	English
Eny KM	Breastfeeding duration, maternal body mass index, and birth weight are associated with differences in body mass index growth trajectories in early childhood	Eny KM, Chen S, Anderson LN, Chen Y, Lebovic G, Pullenayegum E, Parkin PC, Maguire JL, Birken CS; TARGet Kids! Collaboration.	Am J Clin Nutr. 2018 Apr 1;107(4):584-592. doi: 10.1093/ajcn/nqx081.		Am J Clin Nutr	2018	10.1093/ajcn/nqx081	PubMed	Toronto, Ontario, Canada	English								1
Falah-Hassani K	Prevalence and risk factors for comorbid postpartum depressive symptomatology and anxiety	Falah-Hassani K, Shiri R, Dennis CL.	J Affect Disord. 2016 Jul 1;198:142-7. doi: 10.1016/j.jad.2016.03.010. Epub 2016 Mar 16.		J Affect Disord	2016	10.1016/j.jad.2016.03.010	PubMed	Vancouver BC, Canada	English
Fear NT	Re: Breast-feeding and neuroblastoma, USA and Canada	Fear NT, Roman E.	Cancer Causes Control. 2003 Apr;14(3):299; author reply 300. doi: 10.1023/a:1023601924511.		Cancer Causes Control	2003	10.1023/a:1023601924511	PubMed	Canada/United States	English																						1
Feig DS	Breastfeeding predicts the risk of childhood obesity in a multi-ethnic cohort of women with diabetes	Feig DS, Lipscombe LL, Tomlinson G, Blumer I.	J Matern Fetal Neonatal Med. 2011 Mar;24(3):511-5. doi: 10.3109/14767058.2010.500711. Epub 2010 Jul 7.		J Matern Fetal Neonatal Med	2011	10.3109/14767058.2010.500711	PubMed	Toronto, Ontario	English								1
Fenton TR	Nutrition and growth analysis of very low birth weight infants	Fenton TR, McMillan DD, Sauve RS.	Pediatrics. 1990 Sep;86(3):378-83.		Pediatrics	1990		PubMed
Forbes JD	Association of Exposure to Formula in the Hospital and Subsequent Infant Feeding Practices With Gut Microbiota and Risk of Overweight in the First Year of Life	Forbes JD, Azad MB, Vehling L, Tun HM, Konya TB, Guttman DS, Field CJ, Lefebvre D, Sears MR, Becker AB, Mandhane PJ, Turvey SE, Moraes TJ, Subbarao P, Scott JA, Kozyrskyj AL; Canadian Healthy Infant Longitudinal Development (CHILD) Study Investigators.	JAMA Pediatr. 2018 Jul 2;172(7):e181161. doi: 10.1001/jamapediatrics.2018.1161. Epub 2018 Jul 2.		JAMA Pediatr	2018	10.1001/jamapediatrics.2018.1161	PubMed	Vancouver BC, Edmonton Al, Manitoba	English								1																1										1
Friel JK	Evidence of oxidative stress in relation to feeding type during early life in premature infants	Friel JK, Diehl-Jones B, Cockell KA, Chiu A, Rabanni R, Davies SS, Roberts LJ 2nd.	Pediatr Res. 2011 Feb;69(2):160-4. doi: 10.1203/PDR.0b013e3182042a07.		Pediatr Res	2011	10.1203/PDR.0b013e3182042a07	PubMed	Winnipeg MA	English																								1
Fucile S	Identification of a Pivotal Period in the Oral Feeding Progression of Preterm Infants	Fucile S, Phillips S, Bishop K, Jackson M, Yuzdepski T, Dow K.	Am J Perinatol. 2019 Apr;36(5):530-536. doi: 10.1055/s-0038-1669947. Epub 2018 Sep 12.		Am J Perinatol	2019	10.1055/s-0038-1669947	PubMed	Article not retrievable
Galipeau R	Infant and maternal factors influencing breastmilk sodium among primiparous mothers	Galipeau R, Goulet C, Chagnon M.	Breastfeed Med. 2012 Aug;7(4):290-4. doi: 10.1089/bfm.2011.0022. Epub 2012 May 21.		Breastfeed Med	2012	10.1089/bfm.2011.0022	PubMed	Canadian Universities	English																								1
Geoghegan-Morphet N	Development and implementation of a novel online breastfeeding support resource: the Maternal Virtual Infant Nutrition Support Clinic	Geoghegan-Morphet N, Yuen D, Rai E, Angelini M, Christmas M, da Silva O.	Breastfeed Med. 2014 Dec;9(10):520-3. doi: 10.1089/bfm.2014.0051.		Breastfeed Med	2014	10.1089/bfm.2014.0051	PubMed	Canada	English
Gerstein HC	Feasibility and acceptability of a proposed infant feeding intervention trial for the prevention of type I diabetes	Gerstein HC, Simpson JR, Atkinson S, Taylor DW, VanderMeulen J.	Diabetes Care. 1995 Jul;18(7):940-2. doi: 10.2337/diacare.18.7.940.		Diabetes Care	1995	10.2337/diacare.18.7.940	PubMed	Hamilton, Ontario, Canada	English											1
Gerstein HC	Cow's milk exposure and type I diabetes mellitus. A critical overview of the clinical literature	Gerstein HC.	Diabetes Care. 1994 Jan;17(1):13-9. doi: 10.2337/diacare.17.1.13.		Diabetes Care	1994	10.2337/diacare.17.1.13	PubMed	Canada	English											1
Giannakeas V	A model for estimating ovarian cancer risk: application for preventive oophorectomy	Giannakeas V, Sopik V, Shestopaloff K, Iqbal J, Rosen B, Akbari M, Narod SA.	Gynecol Oncol. 2015 Nov;139(2):242-7. doi: 10.1016/j.ygyno.2015.08.020. Epub 2015 Sep 2.		Gynecol Oncol	2015	10.1016/j.ygyno.2015.08.020	PubMed	Ontario, Canada	English																						1
Gingras V	Timing of Complementary Feeding Introduction and Adiposity Throughout Childhood	Gingras V, Aris IM, Rifas-Shiman SL, Switkowski KM, Oken E, Hivert MF.	Pediatrics. 2019 Dec;144(6):e20191320. doi: 10.1542/peds.2019-1320.		Pediatrics	2019	10.1542/peds.2019-1320	PubMed	Eastern Massachusetts US	English								1																1
Girard LC	Development of Aggression Subtypes from Childhood to Adolescence: a Group-Based Multi-Trajectory Modelling Perspective	Girard LC, Tremblay RE, Nagin D, Côté SM.	J Abnorm Child Psychol. 2019 May;47(5):825-838. doi: 10.1007/s10802-018-0488-5.		J Abnorm Child Psychol	2019	10.1007/s10802-018-0488-5	PubMed	Article not retrievable
Goldfield GS	Effects of breastfeeding on weight changes in family-based pediatric obesity treatment	Goldfield GS, Paluch R, Keniray K, Hadjiyannakis S, Lumb AB, Adamo K.	J Dev Behav Pediatr. 2006 Apr;27(2):93-7. doi: 10.1097/00004703-200604000-00002.		J Dev Behav Pediatr	2006	10.1097/00004703-200604000-00002	PubMed	Canada	English								1
Habbick BF	Infantile hypertrophic pyloric stenosis: a study of feeding practices and other possible causes	Habbick BF, Khanna C, To T.	CMAJ. 1989 Feb 15;140(4):401-4.		CMAJ	1989		PubMed
Haiek LN	Postpartum weight loss and infant feeding	Haiek LN, Kramer MS, Ciampi A, Tirado R.	J Am Board Fam Pract. 2001 Mar-Apr;14(2):85-94.		J Am Board Fam Pract	2001		PubMed
Henrick BM	Soluble toll-like receptor 2 is significantly elevated in HIV-1 infected breast milk and inhibits HIV-1 induced cellular activation, inflammation and infection	Henrick BM, Yao XD, Drannik AG, Abimiku A, Rosenthal KL; INFANT Study Team.	AIDS. 2014 Sep 10;28(14):2023-32. doi: 10.1097/QAD.0000000000000381.		AIDS	2014	10.1097/QAD.0000000000000381	PubMed	Ontario, Canada	English																				1		1
Hoban R	Impact of Donor Milk on Short- and Long-Term Growth of Very Low Birth Weight Infants	Hoban R, Schoeny ME, Esquerra-Zwiers A, Kaenkumchorn TK, Casini G, Tobin G, Siegel AH, Patra K, Hamilton M, Wicks J, Meier P, Patel AL.	Nutrients. 2019 Jan 22;11(2):241. doi: 10.3390/nu11020241.		Nutrients	2019	10.3390/nu11020241	PubMed	Did not specify	English																								1
Holsti L	Does breastfeeding reduce acute procedural pain in preterm infants in the neonatal intensive care unit? A randomized clinical trial	Holsti L, Oberlander TF, Brant R.	Pain. 2011 Nov;152(11):2575-81. doi: 10.1016/j.pain.2011.07.022.		Pain	2011	10.1016/j.pain.2011.07.022	PubMed	Vancouver BC	English																									1
Infante-Rivard C	Family size, day-care attendance, and breastfeeding in relation to the incidence of childhood asthma	Infante-Rivard C, Amre D, Gautrin D, Malo JL.	Am J Epidemiol. 2001 Apr 1;153(7):653-8. doi: 10.1093/aje/153.7.653.		Am J Epidemiol	2001	10.1093/aje/153.7.653	PubMed	Montreal, Quebec	English														1
Infante-Rivard C	Markers of infection, breast-feeding and childhood acute lymphoblastic leukaemia	Infante-Rivard C, Fortier I, Olson E.	Br J Cancer. 2000 Dec;83(11):1559-64. doi: 10.1054/bjoc.2000.1495.		Br J Cancer	2000	10.1054/bjoc.2000.1495	PubMed	Quebec, Canada	English																1						1
Jangaard KA	Outcomes in a population of healthy term and near-term infants with serum bilirubin levels of >or=325 micromol/L (>or=19 mg/dL) who were born in Nova Scotia, Canada, between 1994 and 2000	Jangaard KA, Fell DB, Dodds L, Allen AC.	Pediatrics. 2008 Jul;122(1):119-24. doi: 10.1542/peds.2007-0967.		Pediatrics	2008	10.1542/peds.2007-0967	PubMed	Nova Scotia, Canada	English						1
Jenkins AL	Risk factors for hospitalization and infection in Canadian Inuit infants over the first year of life--a pilot study	Jenkins AL, Gyorkos TW, Joseph L, Culman KN, Ward BJ, Pekeles GS, Mills EL.	Int J Circumpolar Health. 2004 Mar;63(1):61-70. doi: 10.3402/ijch.v63i1.17649.		Int J Circumpolar Health	2004	10.3402/ijch.v63i1.17649	PubMed	Inuit	English																				1
Jonas W	The role of breastfeeding in the association between maternal and infant cortisol attunement in the first postpartum year	Jonas W, Bisceglia R, Meaney MJ, Dudin A, Fleming AS, Steiner M; MAVAN Research Team.	Acta Paediatr. 2018 Jul;107(7):1205-1217. doi: 10.1111/apa.14256. Epub 2018 Mar 24.		Acta Paediatr	2018	10.1111/apa.14256	PubMed	Canada	English
Jonas W	Breastfeeding and maternal sensitivity predict early infant temperament	Jonas W, Atkinson L, Steiner M, Meaney MJ, Wazana A, Fleming AS; MAVAN research team.	Acta Paediatr. 2015 Jul;104(7):678-86. doi: 10.1111/apa.12987. Epub 2015 Apr 22.		Acta Paediatr	2015	10.1111/apa.12987	PubMed	Hamilton, Ontario, Canada	English						1
Kaul P	Association between maternal diabetes, being large for gestational age and breast-feeding on being overweight or obese in childhood	Kaul P, Bowker SL, Savu A, Yeung RO, Donovan LE, Ryan EA.	Diabetologia. 2019 Feb;62(2):249-258. doi: 10.1007/s00125-018-4758-0. Epub 2018 Nov 13.		Diabetologia	2019	10.1007/s00125-018-4758-0	PubMed	Calgary AB	English								1
Kehler HL	Risk factors for cessation of breastfeeding prior to six months postpartum among a community sample of women in Calgary, Alberta	Kehler HL, Chaput KH, Tough SC.	Can J Public Health. 2009 Sep-Oct;100(5):376-80. doi: 10.1007/BF03405274.		Can J Public Health	2009	10.1007/BF03405274	PubMed	Calgary AB	English
Kennedy VL	Issues in applying a harm reduction approach to breastfeeding in the context of maternal HIV	Kennedy VL, Loutfy MR, Brophy J; Ontario HIV Infant Feeding Working Group.	Clin Infect Dis. 2015 Feb 15;60(4):672-4. doi: 10.1093/cid/ciu854. Epub 2014 Oct 28.		Clin Infect Dis	2015	10.1093/cid/ciu854	PubMed	Toronto, Ontario, Canada	English
Kingsley SL	Variability and predictors of serum perfluoroalkyl substance concentrations during pregnancy and early childhood	Kingsley SL, Eliot MN, Kelsey KT, Calafat AM, Ehrlich S, Lanphear BP, Chen A, Braun JM.	Environ Res. 2018 Aug;165:247-257. doi: 10.1016/j.envres.2018.04.033. Epub 2018 May 7.		Environ Res	2018	10.1016/j.envres.2018.04.033	PubMed	Cincinnati Ohio	English																											1
Knip M	Hydrolyzed infant formula and early β-cell autoimmunity: a randomized clinical trial	Knip M, Åkerblom HK, Becker D, Dosch HM, Dupre J, Fraser W, Howard N, Ilonen J, Krischer JP, Kordonouri O, Lawson ML, Palmer JP, Savilahti E, Vaarala O, Virtanen SM; TRIGR Study Group.	JAMA. 2014 Jun 11;311(22):2279-87. doi: 10.1001/jama.2014.5610.		JAMA	2014	10.1001/jama.2014.5610	PubMed	Did not specify (15 countries)	English																								1		1
Knip M	Early feeding and risk of type 1 diabetes: experiences from the Trial to Reduce Insulin-dependent diabetes mellitus in the Genetically at Risk (TRIGR)	Knip M, Virtanen SM, Becker D, Dupré J, Krischer JP, Åkerblom HK; TRIGR Study Group.	Am J Clin Nutr. 2011 Dec;94(6 Suppl):1814S-1820S. doi: 10.3945/ajcn.110.000711. Epub 2011 Jun 8.		Am J Clin Nutr	2011	10.3945/ajcn.110.000711	PubMed	Did not specify (15 countries)	English											1
Koehoorn M	Descriptive epidemiological features of bronchiolitis in a population-based cohort	Koehoorn M, Karr CJ, Demers PA, Lencar C, Tamburic L, Brauer M.	Pediatrics. 2008 Dec;122(6):1196-203. doi: 10.1542/peds.2007-2231.		Pediatrics	2008	10.1542/peds.2007-2231	PubMed	Strait of Georgia BC	English		1																		1
Koletzko S	Infant feeding practices and ulcerative colitis in childhood	Koletzko S, Griffiths A, Corey M, Smith C, Sherman P.	BMJ. 1991 Jun 29;302(6792):1580-1. doi: 10.1136/bmj.302.6792.1580.		BMJ	1991	10.1136/bmj.302.6792.1580	PubMed	Did not specify	English																						1
Koletzko S	Role of infant feeding practices in development of Crohn's disease in childhood	Koletzko S, Sherman P, Corey M, Griffiths A, Smith C.	BMJ. 1989 Jun 17;298(6688):1617-8. doi: 10.1136/bmj.298.6688.1617.		BMJ	1989	10.1136/bmj.298.6688.1617	PubMed	Did not specify	English																						1
Kotsopoulos J	Factors influencing ovulation and the risk of ovarian cancer in BRCA1 and BRCA2 mutation carriers	Kotsopoulos J, Lubinski J, Gronwald J, Cybulski C, Demsky R, Neuhausen SL, Kim-Sing C, Tung N, Friedman S, Senter L, Weitzel J, Karlan B, Moller P, Sun P, Narod SA; Hereditary Breast Cancer Clinical Study Group.	Int J Cancer. 2015 Sep 1;137(5):1136-46. doi: 10.1002/ijc.29386. Epub 2014 Dec 18.		Int J Cancer	2015	10.1002/ijc.29386	PubMed	Did not specify (20 countries)	English
Kovesi TA	Severe early lower respiratory tract infection is associated with subsequent respiratory morbidity in preschool Inuit children in Nunavut, Canada	Kovesi TA, Cao Z, Osborne G, Egeland GM.	J Asthma. 2011 Apr;48(3):241-7. doi: 10.3109/02770903.2011.560320.		J Asthma	2011	10.3109/02770903.2011.560320	PubMed	Inuit, Nunavut, Canada	English		1
Kuperberg K	Feeding patterns and weight among First Nations children	Kuperberg K, Evers S.	Can J Diet Pract Res. 2006 Summer;67(2):79-84. doi: 10.3148/67.2.2006.79.		Can J Diet Pract Res	2006	10.3148/67.2.2006.79	PubMed	Walpole, Ontario, Canada	English								1																1
L'Abbé MR	Copper status of very low birth weight infants during the first 12 months of infancy	L'Abbé MR, Friel JK.	Pediatr Res. 1992 Aug;32(2):183-8. doi: 10.1203/00006450-199208000-00012.		Pediatr Res	1992	10.1203/00006450-199208000-00012	PubMed	St Johns, Newfoundland, Canada	English								1
Langner NR	National database on breastfeeding among Indian and Inuit women: Canada 1988	Langner NR, Steckle JM.	Arctic Med Res. 1991;Suppl:563-5.		Arctic Med Res	1991		PubMed	No article
Lebwohl B	Gluten Introduction, Breastfeeding, and Celiac Disease: Back to the Drawing Board	Lebwohl B, Murray JA, Verdú EF, Crowe SE, Dennis M, Fasano A, Green PH, Guandalini S, Khosla C.	Am J Gastroenterol. 2016 Jan;111(1):12-4. doi: 10.1038/ajg.2015.219. Epub 2015 Aug 11.		Am J Gastroenterol	2016	10.1038/ajg.2015.219	PubMed	Did not specify	English																	1
Leclair E	Factors Associated with Breastfeeding Initiation in Adolescent Pregnancies: A Cohort Study	Leclair E, Robert N, Sprague AE, Fleming N.	J Pediatr Adolesc Gynecol. 2015 Dec;28(6):516-21. doi: 10.1016/j.jpag.2015.03.007. Epub 2015 Mar 21.		J Pediatr Adolesc Gynecol	2015	10.1016/j.jpag.2015.03.007	PubMed	Ontario, Canada	English
Lees AW	Risk factors and 10-year breast cancer survival in northern Alberta	Lees AW, Jenkins HJ, May CL, Cherian G, Lam EW, Hanson J.	Breast Cancer Res Treat. 1989 Mar;13(2):143-51. doi: 10.1007/BF01806526.		Breast Cancer Res Treat	1989	10.1007/BF01806526	PubMed	Northern Alberta, Canada	English																																							1
Leung AK	Breast is best for babies	Leung AK, Sauve RS.	J Natl Med Assoc. 2005 Jul;97(7):1010-9.		J Natl Med Assoc	2005		PubMed	No article
Levine OS	Risk factors for invasive pneumococcal disease in children: a population-based case-control study in North America	Levine OS, Farley M, Harrison LH, Lefkowitz L, McGeer A, Schwartz B.	Pediatrics. 1999 Mar;103(3):E28. doi: 10.1542/peds.103.3.e28.		Pediatrics	1999	10.1542/peds.103.3.e28	PubMed	Ontario, Canada (7 other counties)	English																						1
Lindoso L	The Effect of Early-Life Environmental Exposures on Disease Phenotype and Clinical Course of Crohn's Disease in Children	Lindoso L, Mondal K, Venkateswaran S, Somineni HK, Ballengee C, Walters TD, Griffiths A, Noe JD, Crandall W, Snapper S, Rabizadeh S, Rosh JR, LeLeiko N, Guthery S, Mack D, Kellermayer R, Gulati AS, Pfefferkorn MD, Moulton DE, Keljo D, Cohen S, Oliva-Hemker M, Heyman MB, Otley A, Baker SS, Evans JS, Kirschner BS, Patel AS, Ziring D, Stephens MC, Baldassano R, Dubinsky MC, Markowitz J, Denson LA, H…	Am J Gastroenterol. 2018 Oct;113(10):1524-1529. doi: 10.1038/s41395-018-0239-9. Epub 2018 Sep 28.		Am J Gastroenterol	2018	10.1038/s41395-018-0239-9	PubMed	Did not specify	English																						1
Livingstone VH	Neonatal hypernatremic dehydration associated with breast-feeding malnutrition: a retrospective survey	Livingstone VH, Willis CE, Abdel-Wareth LO, Thiessen P, Lockitch G.	CMAJ. 2000 Mar 7;162(5):647-52.		CMAJ	2000		PubMed	No article
Lubin JH	Risk factors for breast cancer in women in northern Alberta, Canada, as related to age at diagnosis	Lubin JH, Burns PE, Blot WJ, Lees AW, May C, Morris LE, Fraumeni JF Jr.	J Natl Cancer Inst. 1982 Feb;68(2):211-7.		J Natl Cancer Inst	1982		PubMed	No article
Lutsiv O	Women's intentions to breastfeed: a population-based cohort study	Lutsiv O, Pullenayegum E, Foster G, Vera C, Giglia L, Chapman B, Fusch C, McDonald SD.	BJOG. 2013 Nov;120(12):1490-8. doi: 10.1111/1471-0528.12376. Epub 2013 Jul 17.		BJOG	2013	10.1111/1471-0528.12376	PubMed	Ontario, Canada	English
MacArthur AC	Risk of childhood leukemia associated with vaccination, infection, and medication use in childhood: the Cross-Canada Childhood Leukemia Study	MacArthur AC, McBride ML, Spinelli JJ, Tamaro S, Gallagher RP, Theriault GP.	Am J Epidemiol. 2008 Mar 1;167(5):598-606. doi: 10.1093/aje/kwm339. Epub 2007 Dec 12.		Am J Epidemiol	2008	10.1093/aje/kwm339	PubMed	BC, Quebec, Alberta, Saskatchewan, Manitoba	English																1				1		1
Macaulay AC	Breastfeeding in the Mohawk community of Kahnawake: revisited and redefined	Macaulay AC, Hanusaik N, Beauvais JE.	Arctic Med Res. 1991;Suppl:581-5.		Arctic Med Res	1991		PubMed	No article	English
Maguire JL	Association between total duration of breastfeeding and iron deficiency	Maguire JL, Salehi L, Birken CS, Carsley S, Mamdani M, Thorpe KE, Lebovic G, Khovratovich M, Parkin PC; TARGet Kids! collaboration.	Pediatrics. 2013 May;131(5):e1530-7. doi: 10.1542/peds.2012-2465. Epub 2013 Apr 15.		Pediatrics	2013	10.1542/peds.2012-2465	PubMed	Toronto, Ontario, Canada	English																								1
Mai XM	The relationship of breast-feeding, overweight, and asthma in preadolescents	Mai XM, Becker AB, Sellers EA, Liem JJ, Kozyrskyj AL.	J Allergy Clin Immunol. 2007 Sep;120(3):551-6. doi: 10.1016/j.jaci.2007.05.004. Epub 2007 Jun 21.		J Allergy Clin Immunol	2007	10.1016/j.jaci.2007.05.004	PubMed	Manitoba, Canada	English								1						1
Mandhane PJ	Interactions between breast-feeding, specific parental atopy, and sex on development of asthma and atopy	Mandhane PJ, Greene JM, Sears MR.	J Allergy Clin Immunol. 2007 Jun;119(6):1359-66. doi: 10.1016/j.jaci.2007.01.043. Epub 2007 Mar 13.		J Allergy Clin Immunol	2007	10.1016/j.jaci.2007.01.043	PubMed	Dunedin, New Zealand	English														1								1
Martens PJ	Predictors of hospital readmission of Manitoba newborns within six weeks postbirth discharge: a population-based study	Martens PJ, Derksen S, Gupta S.	Pediatrics. 2004 Sep;114(3):708-13. doi: 10.1542/peds.2003-0714-L.		Pediatrics	2004	10.1542/peds.2003-0714-L	PubMed	Manitoba, Canada	English		1
Martens PJ	Being born in Manitoba: a look at perinatal health issues	Martens PJ, Derksen S, Mayer T, Walld R.	Can J Public Health. 2002 Nov-Dec;93 Suppl 2(Suppl 2):S33-8. doi: 10.1007/BF03403616.		Can J Public Health	2002	10.1007/BF03403616	PubMed	Manitoba, Canada	English								1																1
Martens PJ	Increasing breastfeeding initiation and duration at a community level: an evaluation of Sagkeeng First Nation's community health nurse and peer counselor programs	Martens PJ.	J Hum Lact. 2002 Aug;18(3):236-46. doi: 10.1177/089033440201800305.		J Hum Lact	2002	10.1177/089033440201800305	PubMed	First Nations - Sagkeeng (Manitoba)	English																								1
Mastroeni MF	Breast-feeding duration for the prevention of excess body weight of mother-child pairs concurrently: a 2-year cohort study	Mastroeni MF, Mastroeni SSBS, Czarnobay SA, Ekwaru JP, Loehr SA, Veugelers PJ.	Public Health Nutr. 2017 Oct;20(14):2537-2548. doi: 10.1017/S1368980017001239. Epub 2017 Jun 19.		Public Health Nutr	2017	10.1017/S1368980017001239	PubMed	Joinville, Brazil	English								1
McDonald SW	A comparison between late preterm and term infants on breastfeeding and maternal mental health	McDonald SW, Benzies KM, Gallant JE, McNeil DA, Dolan SM, Tough SC.	Matern Child Health J. 2013 Oct;17(8):1468-77. doi: 10.1007/s10995-012-1153-1.		Matern Child Health J	2013	10.1007/s10995-012-1153-1	PubMed	Calgary AB	English
McIsaac KE	Exclusive breastfeeding among Canadian Inuit: results from the Nunavut Inuit Child Health Survey	McIsaac KE, Lou W, Sellen D, Young TK.	J Hum Lact. 2014 May;30(2):229-41. doi: 10.1177/0890334413515752. Epub 2013 Dec 18.		J Hum Lact	2014	10.1177/0890334413515752	PubMed	Inuit, Nunavut, Canada	English																								1
Menegaux F	Day care, childhood infections, and risk of neuroblastoma	Menegaux F, Olshan AF, Neglia JP, Pollock BH, Bondy ML.	Am J Epidemiol. 2004 May 1;159(9):843-51. doi: 10.1093/aje/kwh111.		Am J Epidemiol	2004	10.1093/aje/kwh111	PubMed	United States/Canada	English																				1		1
Midodzi WK	Early life factors associated with incidence of physician-diagnosed asthma in preschool children: results from the Canadian Early Childhood Development cohort study	Midodzi WK, Rowe BH, Majaesic CM, Saunders LD, Senthilselvan A.	J Asthma. 2010 Feb;47(1):7-13. doi: 10.3109/02770900903380996.		J Asthma	2010	10.3109/02770900903380996	PubMed	Canada	English														1
Midodzi WK	Predictors for wheezing phenotypes in the first decade of life	Midodzi WK, Rowe BH, Majaesic CM, Saunders LD, Senthilselvan A.	Respirology. 2008 Jun;13(4):537-45. doi: 10.1111/j.1440-1843.2008.01284.x. Epub 2008 Apr 10.		Respirology	2008	10.1111/j.1440-1843.2008.01284.x	PubMed	Canada	English																										1
Mikelova LK	Predictors of death in infants hospitalized with pertussis: a case-control study of 16 pertussis deaths in Canada	Mikelova LK, Halperin SA, Scheifele D, Smith B, Ford-Jones E, Vaudry W, Jadavji T, Law B, Moore D; Members of the Immunization Monitoring Program, Active (IMPACT).	J Pediatr. 2003 Nov;143(5):576-81. doi: 10.1067/S0022-3476(03)00365-2.		J Pediatr	2003	10.1067/S0022-3476(03)00365-2	PubMed	Canada	English		1
Milnes AR	Description and epidemiology of nursing caries	Milnes AR.	J Public Health Dent. 1996 Winter;56(1):38-50. doi: 10.1111/j.1752-7325.1996.tb02394.x.		J Public Health Dent	1996	10.1111/j.1752-7325.1996.tb02394.x	PubMed	Canada, Anitgua, United States, Iraq, Kuwait, Sudan, Tanzania, Nigeria, South Africa, Indonesia, Australia, Finland, Sweden, England	English										1
Moffitt P	Creating exclusive breastfeeding knowledge translation tools with First Nations mothers in Northwest Territories, Canada	Moffitt P, Dickinson R.	Int J Circumpolar Health. 2016 Dec 9;75:32989. doi: 10.3402/ijch.v75.32989. eCollection 2016.		Int J Circumpolar Health	2016	10.3402/ijch.v75.32989	PubMed	Northwest Territories, First Nations, Canada	English
Moossavi S	Composition and Variation of the Human Milk Microbiota Are Influenced by Maternal and Early-Life Factors	Moossavi S, Sepehri S, Robertson B, Bode L, Goruk S, Field CJ, Lix LM, de Souza RJ, Becker AB, Mandhane PJ, Turvey SE, Subbarao P, Moraes TJ, Lefebvre DL, Sears MR, Khafipour E, Azad MB.	Cell Host Microbe. 2019 Feb 13;25(2):324-335.e4. doi: 10.1016/j.chom.2019.01.011.		Cell Host Microbe	2019	10.1016/j.chom.2019.01.011	PubMed	Did not specify	English																										1
Nashid N	Breastfeeding by Women Living With Human Immunodeficiency Virus in a Resource-Rich Setting: A Case Series of Maternal and Infant Management and Outcomes	Nashid N, Khan S, Loutfy M, MacGillivray J, Yudin MH, Campbell DM, Barozzino T, Baqi M, Read SE, Bitnun A.	J Pediatric Infect Dis Soc. 2020 Apr 30;9(2):228-231. doi: 10.1093/jpids/piz003.		J Pediatric Infect Dis Soc	2020	10.1093/jpids/piz003	PubMed	Did not specify	English																						1
Nickel NC	Protocol for establishing an infant feeding database linkable with population-based administrative data: a prospective cohort study in Manitoba, Canada	Nickel NC, Warda L, Kummer L, Chateau J, Heaman M, Green C, Katz A, Paul J, Perchuk C, Girard D, Larocque L, Enns JE, Shaw S; Manitoba Infant Feeding Database Development Team.	BMJ Open. 2017 Oct 22;7(10):e017981. doi: 10.1136/bmjopen-2017-017981.		BMJ Open	2017	10.1136/bmjopen-2017-017981	PubMed	Manitoba, Canada	English																								1
Ordean A	Comprehensive treatment program for pregnant substance users in a family medicine clinic	Ordean A, Kahan M.	Can Fam Physician. 2011 Nov;57(11):e430-5.		Can Fam Physician	2011		PubMed	No article
Pabst HF	Differential modulation of the immune response by breast- or formula-feeding of infants	Pabst HF, Spady DW, Pilarski LM, Carson MM, Beeler JA, Krezolek MP.	Acta Paediatr. 1997 Dec;86(12):1291-7. doi: 10.1111/j.1651-2227.1997.tb14900.x.		Acta Paediatr	1997	10.1111/j.1651-2227.1997.tb14900.x	PubMed	Edmonton, Alberta, Canada	English																								1
Pabst HF	Immunomodulation by breast-feeding	Pabst HF.	Pediatr Infect Dis J. 1997 Oct;16(10):991-5. doi: 10.1097/00006454-199710000-00017.		Pediatr Infect Dis J	1997	10.1097/00006454-199710000-00017	PubMed	No article
Pabst HF	Effect of breast-feeding on antibody response to conjugate vaccine	Pabst HF, Spady DW.	Lancet. 1990 Aug 4;336(8710):269-70. doi: 10.1016/0140-6736(90)91802-h.		Lancet	1990	10.1016/0140-6736(90)91802-h	PubMed	Edmonton, Alberta, Canada	English																					1
Pabst HF	Effect of breast-feeding on immune response to BCG vaccination	Pabst HF, Godel J, Grace M, Cho H, Spady DW.	Lancet. 1989 Feb 11;1(8633):295-7. doi: 10.1016/s0140-6736(89)91307-x.		Lancet	1989	10.1016/s0140-6736(89)91307-x	PubMed	First Nations - Cree (Alberta/Edmonton)	English																					1
Parkin PC	Severe iron-deficiency anaemia and feeding practices in young children	Parkin PC, DeGroot J, Maguire JL, Birken CS, Zlotkin S.	Public Health Nutr. 2016 Mar;19(4):716-22. doi: 10.1017/S1368980015001639. Epub 2015 Jun 1.		Public Health Nutr	2016	10.1017/S1368980015001639	PubMed	Canada	English																										1
Pérez-Escamilla R	Equity in breastfeeding: where do we go from here?	Pérez-Escamilla R, Sellen D.	J Hum Lact. 2015 Feb;31(1):12-4. doi: 10.1177/0890334414561062.		J Hum Lact	2015	10.1177/0890334414561062	PubMed	Did not specify	English																								1
Pinelli J	Effect of breastmilk consumption on neurodevelopmental outcomes at 6 and 12 months of age in VLBW infants	Pinelli J, Saigal S, Atkinson SA.	Adv Neonatal Care. 2003 Apr;3(2):76-87. doi: 10.1053/adnc.2003.50017.		Adv Neonatal Care	2003	10.1053/adnc.2003.50017	PubMed	Ontario, Canada	English						1
Pitt TJ	Reduced risk of peanut sensitization following exposure through breast-feeding and early peanut introduction	Pitt TJ, Becker AB, Chan-Yeung M, Chan ES, Watson WTA, Chooniedass R, Azad MB.	J Allergy Clin Immunol. 2018 Feb;141(2):620-625.e1. doi: 10.1016/j.jaci.2017.06.024. Epub 2017 Sep 12.		J Allergy Clin Immunol	2018	10.1016/j.jaci.2017.06.024	PubMed	Winnipeg MB, Vancouver BC	English												1
Postl BD	Hyperbilirubinemia in Inuit neonates	Postl BD, Nelson N, Carson J.	Can Med Assoc J. 1982 Apr 1;126(7):811-3.		Can Med Assoc J	1982		PubMed	No article
Ramsay M	Neonatal sucking and maternal feeding practices	Ramsay M, Gisel EG.	Dev Med Child Neurol. 1996 Jan;38(1):34-47. doi: 10.1111/j.1469-8749.1996.tb15030.x.		Dev Med Child Neurol	1996	10.1111/j.1469-8749.1996.tb15030.x	PubMed	Montreal, Quebec, Canada	English																								1
Rao DP	Status report -- Childhood overweight and obesity in Canada: an integrative assessment	Rao DP, Kropac E, Do MT, Roberts KC, Jayaraman GC.	Health Promot Chronic Dis Prev Can. 2017 Mar;37(3):87-93. doi: 10.24095/hpcdp.37.3.04.		Health Promot Chronic Dis Prev Can	2017	10.24095/hpcdp.37.3.04	PubMed	Canada	English								1
Rioux FM	Is there a link between postpartum anemia and discontinuation of breastfeeding?	Rioux FM, Savoie N, Allard J.	Can J Diet Pract Res. 2006 Summer;67(2):72-6. doi: 10.3148/67.2.2006.72.		Can J Diet Pract Res	2006	10.3148/67.2.2006.72	PubMed	Moncton, New Brunswich, Canada	English
Ripmeester P	Against all odds: breastfeeding a baby with harlequin ichthyosis	Ripmeester P, Dunn S.	J Obstet Gynecol Neonatal Nurs. 2002 Sep-Oct;31(5):521-5. doi: 10.1111/j.1552-6909.2002.tb00076.x.		J Obstet Gynecol Neonatal Nurs	2002	10.1111/j.1552-6909.2002.tb00076.x	PubMed	Canada	English																											1
Rosenberg AM	Evaluation of associations between breast feeding and subsequent development of juvenile rheumatoid arthritis	Rosenberg AM.	J Rheumatol. 1996 Jun;23(6):1080-2.		J Rheumatol	1996		PubMed	No article
Rovet JF	Does breast-feeding protect the hypothyroid infant whose condition is diagnosed by newborn screening?	Rovet JF.	Am J Dis Child. 1990 Mar;144(3):319-23. doi: 10.1001/archpedi.1990.02150270069028.		Am J Dis Child	1990	10.1001/archpedi.1990.02150270069028	PubMed	Toronto, Ontario, Canada	English																						1
Saddlemire S	Breast-feeding and Wilms tumor: a report from the Children's Oncology Group	Saddlemire S, Olshan AF, Daniels JL, Breslow NE, Bunin GR, Ross JA.	Cancer Causes Control. 2006 Jun;17(5):687-93. doi: 10.1007/s10552-005-0508-y.		Cancer Causes Control	2006	10.1007/s10552-005-0508-y	PubMed	United States/Canada	English																						1
Schaefer O	Letter: Otitis media in Eskimos	Schaefer O.	Pediatrics. 1974 Oct;54(4):521.		Pediatrics	1974		PubMed	No article
Schaefer O	Otitis media and bottle-feeding. An epidemiological study of infant feeding habits and incidence of recurrent and chronic middle ear disease in Canadian Eskimos	Schaefer O.	Can J Public Health. 1971 Nov-Dec;62(6):478-89.		Can J Public Health	1971		PubMed	No article
Schroeder D	Rediscovering empowerment with breastfeeding in an urban First Nation's population	Schroeder D, Larsen P, Byrd NJ.	BMC Pregnancy Childbirth. 2019 Dec 19;19(1):509. doi: 10.1186/s12884-019-2631-x.		BMC Pregnancy Childbirth	2019	10.1186/s12884-019-2631-x	PubMed	First Nation	English																								1
Shaukat A	Is being breastfed as an infant associated with adult pulmonary function?	Shaukat A, Freudenheim JL, Grant BJ, Muti P, Ochs-Balcom HM, McCann SE, Trevisan M, Iacoviello L, Schünemann HJ.	J Am Coll Nutr. 2005 Oct;24(5):327-33. doi: 10.1080/07315724.2005.10719481.		J Am Coll Nutr	2005	10.1080/07315724.2005.10719481	PubMed	Eric & Niagara - Canada	English
Shi Y	Perinatal and early childhood factors for overweight and obesity in young Canadian children	Shi Y, De Groh M, Morrison H.	Can J Public Health. 2013 Jan 7;104(1):e69-74. doi: 10.1007/BF03405658.		Can J Public Health	2013	10.1007/BF03405658	PubMed	Canada	English								1
Shu XO	An exploratory analysis of risk factors for childhood malignant germ-cell tumors: report from the Childrens Cancer Group (Canada, United States)	Shu XO, Nesbit ME, Buckley JD, Krailo MD, Robinson LL.	Cancer Causes Control. 1995 May;6(3):187-98. doi: 10.1007/BF00051790.		Cancer Causes Control	1995	10.1007/BF00051790	PubMed	United States/Canada	English																						1
Slae M	Role of Environmental Factors in the Development of Pediatric Eosinophilic Esophagitis	Slae M, Persad R, Leung AJ, Gabr R, Brocks D, Huynh HQ.	Dig Dis Sci. 2015 Nov;60(11):3364-72. doi: 10.1007/s10620-015-3740-7. Epub 2015 Jun 11.		Dig Dis Sci	2015	10.1007/s10620-015-3740-7	PubMed	Canada	English												1
Stearns JC	Ethnic and diet-related differences in the healthy infant microbiome	Stearns JC, Zulyniak MA, de Souza RJ, Campbell NC, Fontes M, Shaikh M, Sears MR, Becker AB, Mandhane PJ, Subbarao P, Turvey SE, Gupta M, Beyene J, Surette MG, Anand SS; NutriGen Alliance.	Genome Med. 2017 Mar 29;9(1):32. doi: 10.1186/s13073-017-0421-5.		Genome Med	2017	10.1186/s13073-017-0421-5	PubMed	Vancouver BC, Edmonton AB, Winnipeg MB, Toronto ON	English																								1										1
Stern L	Hyperbilirubinemia in Indian newborns	Stern L.	Can Med Assoc J. 1984 Dec 15;131(12):1436.		Can Med Assoc J	1984		PubMed	No article
Tchakoute CT	Breastfeeding mitigates the effects of maternal HIV on infant infectious morbidity in the Option B+ era	Tchakoute CT, Sainani KL, Osawe S, Datong P, Kiravu A, Rosenthal KL, Gray CM, Cameron DW, Abimiku A, Jaspan HB; INFANT study team.	AIDS. 2018 Oct 23;32(16):2383-2391. doi: 10.1097/QAD.0000000000001974.		AIDS	2018	10.1097/QAD.0000000000001974	PubMed	Cape Town, South Africa	English																						1
Timmermans FJ	Chronic granulomatous otitis media in bottle-fed Inuit children	Timmermans FJ, Gerson S.	Can Med Assoc J. 1980 Mar 8;122(5):545-7.		Can Med Assoc J	1980		PubMed	No article
Ukah UV	The Impact of a History of Adverse Childhood Experiences on Breastfeeding Initiation and Exclusivity: Findings from a National Population Health Survey	Ukah UV, Adu PA, De Silva DA, von Dadelszen P.	Breastfeed Med. 2016 Dec;11:544-550. doi: 10.1089/bfm.2016.0053. Epub 2016 Oct 11.		Breastfeed Med	2016	10.1089/bfm.2016.0053	PubMed	Canada	English																								1
Vadas P	Detection of peanut allergens in breast milk of lactating women	Vadas P, Wai Y, Burks W, Perelman B.	JAMA. 2001 Apr 4;285(13):1746-8. doi: 10.1001/jama.285.13.1746.		JAMA	2001	10.1001/jama.285.13.1746	PubMed	Canada	English												1
Vehling L	Exclusive breastfeeding in hospital predicts longer breastfeeding duration in Canada: Implications for health equity	Vehling L, Chan D, McGavock J, Becker AB, Subbarao P, Moraes TJ, Mandhane PJ, Turvey SE, Lefebvre DL, Sears MR, Azad MB.	Birth. 2018 Dec;45(4):440-449. doi: 10.1111/birt.12345. Epub 2018 Mar 2.		Birth	2018	10.1111/birt.12345	PubMed	Canada	English																								1
Visness CM	The frequency of coitus during breastfeeding	Visness CM, Kennedy KI.	Birth. 1997 Dec;24(4):253-7. doi: 10.1111/j.1523-536x.1997.tb00599.x.		Birth	1997	10.1111/j.1523-536x.1997.tb00599.x	PubMed	Montreal Canada, Australia, United Kingdom	English																								1
Walters DD	The cost of not breastfeeding: global results from a new tool	Walters DD, Phan LTH, Mathisen R.	Health Policy Plan. 2019 Jul 1;34(6):407-417. doi: 10.1093/heapol/czz050.		Health Policy Plan	2019	10.1093/heapol/czz050	PubMed	130 Countries	English																								1
Ward LM	Vitamin D-deficiency rickets among children in Canada	Ward LM, Gaboury I, Ladhani M, Zlotkin S.	CMAJ. 2007 Jul 17;177(2):161-6. doi: 10.1503/cmaj.061377. Epub 2007 Jun 28.		CMAJ	2007	10.1503/cmaj.061377	PubMed	Canada	English																								1
Watt S	The effect of delivery method on breastfeeding initiation from the The Ontario Mother and Infant Study (TOMIS) III	Watt S, Sword W, Sheehan D, Foster G, Thabane L, Krueger P, Landy CK.	J Obstet Gynecol Neonatal Nurs. 2012 Nov-Dec;41(6):728-37. doi: 10.1111/j.1552-6909.2012.01394.x. Epub 2012 Jul 23.		J Obstet Gynecol Neonatal Nurs	2012	10.1111/j.1552-6909.2012.01394.x	PubMed	Ontario, Canada	English
Wayne C	Formula-feeding and hypertrophic pyloric stenosis: is there an association? A case-control study	Wayne C, Hung JH, Chan E, Sedgwick I, Bass J, Nasr A.	J Pediatr Surg. 2016 May;51(5):779-82. doi: 10.1016/j.jpedsurg.2016.02.021. Epub 2016 Feb 12.		J Pediatr Surg	2016	10.1016/j.jpedsurg.2016.02.021	PubMed	Ontario, Canada	English																									1
Weinstein P	Epidemiologic study of 19-month-old Edmonton, Alberta children: caries rates and risk factors	Weinstein P, Smith WF, Fraser-Lee N, Shimono T, Tsubouchi J.	ASDC J Dent Child. 1996 Nov-Dec;63(6):426-33.		ASDC J Dent Child	1996		PubMed	No article
Whitehead E	Relation of pregnancy and neonatal factors to subsequent development of childhood epilepsy: a population-based cohort study	Whitehead E, Dodds L, Joseph KS, Gordon KE, Wood E, Allen AC, Camfield P, Dooley JM.	Pediatrics. 2006 Apr;117(4):1298-306. doi: 10.1542/peds.2005-1660.		Pediatrics	2006	10.1542/peds.2005-1660	PubMed	Nova Scotia, Canada	English						1
Whitfield KC	Exploration of Responsive Feeding During Breastfeeding Versus Bottle Feeding of Human Milk: A Within-Subject Pilot Study	Whitfield KC, Ventura AK.	Breastfeed Med. 2019 Sep;14(7):482-486. doi: 10.1089/bfm.2019.0069. Epub 2019 Jun 12.		Breastfeed Med	2019	10.1089/bfm.2019.0069	PubMed	Halifax, Nova Scotia, Canada	English																								1
Williams SA	An inquiry into the effects of health related behaviour on dental health among young Asian children resident in a fluoridated city in Canada	Williams SA, Hargreaves JA.	Community Dent Health. 1990 Dec;7(4):413-20.		Community Dent Health	1990		PubMed	No article
Willows ND	Anemia and iron status in Inuit infants from northern Quebec	Willows ND, Dewailly E, Gray-Donald K.	Can J Public Health. 2000 Nov-Dec;91(6):407-10. doi: 10.1007/BF03404818.		Can J Public Health	2000	10.1007/BF03404818	PubMed	Nunavik, Quebec, Canada	English																								1		1
Wilson CE	Cree infant care practices and sudden infant death syndrome	Wilson CE.	Can J Public Health. 2000 Mar-Apr;91(2):133-6. doi: 10.1007/BF03404929.		Can J Public Health	2000	10.1007/BF03404929	PubMed	Cree, First Nations	English							1
Wong PD	Total Breast-Feeding Duration and Dental Caries in Healthy Urban Children	Wong PD, Birken CS, Parkin PC, Venu I, Chen Y, Schroth RJ, Maguire JL; TARGet Kids! Collaboration.	Acad Pediatr. 2017 Apr;17(3):310-315. doi: 10.1016/j.acap.2016.10.021.		Acad Pediatr	2017	10.1016/j.acap.2016.10.021	PubMed	Toronto, Ontario, Canada	English										1
Work ME	Reproductive risk factors and oestrogen/progesterone receptor-negative breast cancer in the Breast Cancer Family Registry	Work ME, John EM, Andrulis IL, Knight JA, Liao Y, Mulligan AM, Southey MC, Giles GG, Dite GS, Apicella C, Hibshoosh H, Hopper JL, Terry MB.	Br J Cancer. 2014 Mar 4;110(5):1367-77. doi: 10.1038/bjc.2013.807. Epub 2014 Feb 18.		Br J Cancer	2014	10.1038/bjc.2013.807	PubMed	Ontario Canada, USA, Australia	English																																							1
Wormworth J	Toxins and tradition: the impact of food-chain contamination on the Inuit of northern Quebec	Wormworth J.	CMAJ. 1995 Apr 15;152(8):1237-40.		CMAJ	1995		PubMed	No article
Wren-Atilola HM	Infant growth faltering linked to subclinical mastitis, maternal faecal-oral contamination, and breastfeeding	Wren-Atilola HM, Solomons NW, Scott ME, Koski KG.	Matern Child Nutr. 2019 Jul;15(3):e12756. doi: 10.1111/mcn.12756. Epub 2019 Jan 13.		Matern Child Nutr	2019	10.1111/mcn.12756	PubMed	First Nations	English								1
Yang S	Breastfeeding is associated with upward social mobility	Yang S.	J Pediatr. 2014 Jan;164(1):216-9. doi: 10.1016/j.jpeds.2013.10.060.		J Pediatr	2014	10.1016/j.jpeds.2013.10.060	PubMed	Great Britain	English																								1
Young TK	Type 2 diabetes mellitus in children: prenatal and early infancy risk factors among native canadians	Young TK, Martens PJ, Taback SP, Sellers EA, Dean HJ, Cheang M, Flett B.	Arch Pediatr Adolesc Med. 2002 Jul;156(7):651-5. doi: 10.1001/archpedi.156.7.651.		Arch Pediatr Adolesc Med	2002	10.1001/archpedi.156.7.651	PubMed	Manitoba, Canada	English											1
McLaughlin JR	Reproductive risk factors for ovarian cancer in carriers of BRCA1 or BRCA2 mutations: a case-control study.	McLaughlin JR, Risch HA, Lubinski J, et al.	McLaughlin JR, Risch HA, Lubinski J, et al. Reproductive risk factors for ovarian cancer in carriers of BRCA1 or BRCA2 mutations: a case-control study. The Lancet. Oncology. 2007 Jan;8(1):26-34. DOI: 10.1016/s1470-2045(06)70983-4.		Lancet	2007	https://doi.org/10.1016/s1470-2045(06)70983-4		Toronto	English																																							1
[truncated: 17 more columns]
